# Supplementary material
Source: MDPI journal article supplement (https://www.mdpi.com/2076-3417/9/16/3310)

## Article

# Selection of Co-Belonging Ceramic Fragments from Archaeological Excavations and Their Location in Vase Bodies from Thermoremanent Magnetization

Markos Ntoukakis <sup>\*1</sup>, Apostolos Pantinakis <sup>2</sup>, Antonios Vafidis <sup>1</sup> and Theodoros Markopoulos <sup>1</sup>

<sup>1</sup> School of Mineral Resources Engineering, Technical University of Crete, Chania, 73100, Greece

<sup>2</sup> School of Electrical and Computer Engineering, Technical University of Crete, Chania, 73100, Greece

\* Correspondence: (markosntoukakis@gmail.com); Tel.: +30-28210-37023

Received: 17 May 2019; Accepted: 25 July 2019; Published: date

## Supplementary Files

### Computation of magnetization in body fragments from vases 1–6

Indicative detailed experimental results with the methodology reported in Section 7 are given (**Tables 1–4**) using measurements of body fragments from **vase 6**.

For each of the remaining vases, 2 tables of measurements are presented. The first table contains measurements of the fragments' thickness,  $L$ , of the distance,  $D$ , between the measurement position and the fragment edge in the common direction of the  $M_{xz}$ ,  $B_{xz}$  and the sensor readings of  $B_i$  ( $i=x,z,y$ ), with the x-sensor aligned along the direction of  $B_{xz}$ .

The second table contains the sensor readings of  $B_i$  ( $i=x,y,z$ ), with the x-sensor oriented in the grooves' direction on the body fragments.

The above quantities and the relationships 4,5 are used for the calculation of magnetization components.

**Table 1.** Measurements D, L, and sensor readings of  $B_i$  ( $i=x,z,y$ ), with the x-sensor aligned along the common direction of  $B_{xz}$ ,  $M_{xz}$ , on the body fragments of **vase 6**.

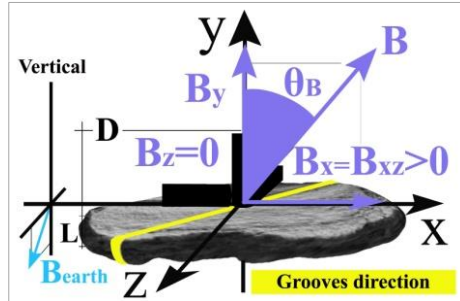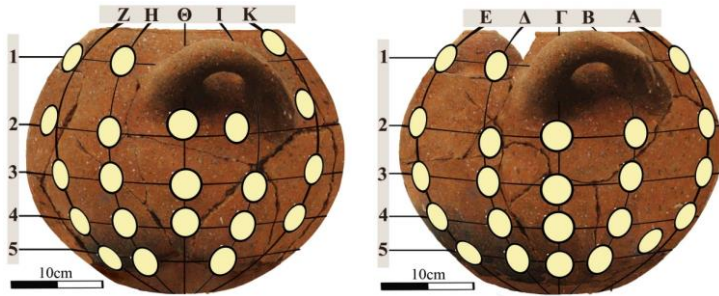

**Vase 6**

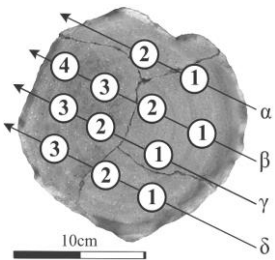

| Vase 6 (Base) | $\lambda$  | $\alpha^l(\text{cm})$ | $\alpha^{ll}(\text{cm})$ |
|---------------|------------|-----------------------|--------------------------|
|               | 1.90       | 0.71                  | 1.07                     |
|               | $\pm 0.01$ | $\pm 0.03$            | $\pm 0.02$               |

The computed magnitude of field,  $B$ , differs, while angles,  $\theta_B$ , varies in a systematic way.

| Vase 6 |                         | A     | B     | Γ     | Δ     | E     | Z     | H     | Θ     | I     | K     |
|--------|-------------------------|-------|-------|-------|-------|-------|-------|-------|-------|-------|-------|
| 1      | D (±0.3) cm             | 4.2   |       |       | 3.4   | 6.2   | 2.2   | 6.2   |       |       | 10.6  |
|        | L (±0.1) cm             | 0.9   |       |       | 0.8   | 0.7   | 0.7   | 0.7   |       |       | 0.9   |
|        | B <sub>xz</sub> (±1) nT | 32    |       |       | 6     | 6     | 29    | 38    |       |       | 37    |
|        | B <sub>y</sub> (±1) nT  | 4     |       |       | 17    | 14    | 7     | 3     |       |       | -3    |
|        | B (±1) nT               | 32    |       |       | 18    | 15    | 30    | 38    |       |       | 37    |
|        | θ <sub>B</sub> °        | 83±2  |       |       | 20±3  | 24±4  | 76±2  | 85±2  |       |       | -85±2 |
| 2      | D (±0.3) cm             | 2.4   | 14.8  | 10.7  | 1.2   | 6.3   | 4.8   | 3.2   | 2.1   | 3.4   | 2.5   |
|        | L (±0.1) cm             | 1.6   | 1.6   | 1.7   | 1.9   | 1.5   | 1.6   | 1.8   | 1.8   | 1.9   | 1.9   |
|        | B <sub>xz</sub> (±1) nT | 39    | 35    | 24    | 20    | 17    | 37    | 34-3  | 35    | 35    | 27    |
|        | B <sub>y</sub> (±1) nT  | 2     | 6     | 14    | 16    | 15    | 2     | 34    | -7    | -7    | -13   |
|        | B (±1) nT               | 39    | 36    | 28    | 25    | 22    | 37    |       | 36    | 36    | 30    |
|        | θ <sub>B</sub> °        | 87±1  | 80±2  | 60±2  | 52±2  | 49±3  | 87±2  | -85±2 | -78±2 | -78±2 | -65±2 |
| 3      | D (±0.3) cm             | 17.2  | 2.0   | 1.6   | 2.9   | 1.9   | 2.6   | 6.2   | 4.9   | 10.0  | 7.5   |
|        | L (±0.1) cm             | 1.5   | 1.7   | 1.7   | 1.5   | 1.4   | 1.5   | 1.7   | 1.9   | 1.8   | 1.8   |
|        | B <sub>xz</sub> (±1) nT | 35    | 37    | 37    | 34    | 31    | 34    | 32    | 25    | 18    | 18    |
|        | B <sub>y</sub> (±1) nT  | -5    | 1     | 4     | 7     | 7     | -3    | -8    | -13   | -16   | -17   |
|        | B (±1) nT               | 35    | 37    | 37    | 35    | 32    | 34    | 33    | 28    | 24    | 25    |
|        | θ <sub>B</sub> °        | -81±2 | 88±2  | 84±2  | 78±2  | 77±2  | -85±2 | -75±2 | -63±2 | -49±2 | -47±2 |
| 4      | D (±0.3) cm             | 7.5   | 5.5   | 5.9   | 8.7   | 6.8   | 1.8   | 5.1   | 2.5   | 6.4   | 5.1   |
|        | L (±0.1) cm             | 1.4   | 1.3   | 1.4   | 1.5   | 1.3   | 1.2   | 1.4   | 1.5   | 1.5   | 1.6   |
|        | B <sub>xz</sub> (±1) nT | 31    | 33    | 39    | 37    | 38    | 32    | 26    | 24    | 7     | 5     |
|        | B <sub>y</sub> (±1) nT  | -8    | -5    | 2     | 3     | 2     | -7    | -12   | -15   | -19   | -18   |
|        | B (±1) nT               | 32    | 33    | 39    | 37    | 38    | 33    | 28    | 28    | 20    | 19    |
|        | θ <sub>B</sub> °        | -75±2 | -81±2 | 87±1  | 85±2  | 87±2  | -77±2 | -66±2 | -58±2 | -20±3 | -16±3 |
| 5      | D (±0.3) cm             | 1.9   | 2.3   | 9.7   | 4.1   | 3.6   | 2.0   | 4.5   |       | 3.8   |       |
|        | L (±0.1) cm             | 1.0   | 1.2   | 1.1   | 1.2   | 1.2   | 1.1   | 1.0   |       | 1.1   |       |
|        | B <sub>xz</sub> (±1) nT | 25    | 34    | 33    | 34    | 34    | 27    | 23    |       | 4     |       |
|        | B <sub>y</sub> (±1) nT  | -11   | -7    | -6    | -2    | -3    | -12   | -13   |       | -17   |       |
|        | B (±1) nT               | 27    | 35    | 34    | 34    | 34    | 29    | 26    |       | 17    |       |
|        | θ <sub>B</sub> °        | -67±2 | -78±2 | -79±2 | -86±2 | -85±2 | -67±2 | -61±2 |       | -13±3 |       |

| Vase 6 |                        | A       | B       | Г       | Δ       | E       | Z       | H       | Θ       | I       | K       |
|--------|------------------------|---------|---------|---------|---------|---------|---------|---------|---------|---------|---------|
| 1      | D (±0.3) cm            | 4.2     |         |         | 3.4     | 6.2     | 2.2     | 6.2     |         |         | 10.6    |
|        | d(cm)                  | 3.6±1   |         |         | 0.2±0.0 | 0.2±0.0 | 1.5±0.2 | 4.4±1.4 |         |         | 5.6±1.8 |
|        | θ°                     | 76±3    |         |         | 14±2    | 17±3    | 65±3    | 81±3    |         |         | -81±3   |
|        | M <sub>xz</sub> (mA/m) | 51±2    |         |         | 15±3    | 16±3    | 48±2    | 61±2    |         |         | 59±2    |
|        | M <sub>y</sub> (A/m)   | 13±3    |         |         | 64±4    | 54±4    | 23±3    | 10±3    |         |         | -10±3   |
|        | M(mA/m)                | 53±2    |         |         | 66±4    | 56±4    | 53±2    | 61±2    |         |         | 60±2    |
| 2      | D (±0.3) cm            | 2.4     | 14.8    | 10,7    | 1,2     | 6,3     | 4,8     | 3,2     | 2,1     | 3,4     | 2,5     |
|        | d(cm)                  | 16±7    | 4.7±0.8 | 1.6±0.1 | 1.3±0.1 | 1.0±0.1 | 15±7    | 10±3    | 4.5±0.6 | 4.8±0.7 | 2.2±0.2 |
|        | θ°                     | 84±3    | 71±3    | 44±2    | 35±2    | 33±2    | 84±3    | -80±3   | -68±3   | -68±3   | -49±2   |
|        | M <sub>xz</sub> (mA/m) | 62±2    | 56±2    | 40±2    | 35±2    | 30±2    | 59±2    | 54±2    | 57±2    | 56±2    | 44±2    |
|        | M <sub>y</sub> (A/m)   | 6±3     | 19±3    | 42±3    | 49±3    | 47±3    | 6±3     | -10±3   | -22±3   | -22±3   | -39±3   |
|        | M(mA/m)                | 62±2    | 59±2    | 58±3    | 60±3    | 56±3    | 59±2    | 55±2    | 61±2    | 60±2    | 59±2    |
| 3      | D (±0.3) cm            | 17.2    | 2,0     | 1,6     | 2,9     | 1,9     | 2,6     | 6,2     | 4,9     | 10,0    | 7,5     |
|        | d(cm)                  | 5±1     | 32±30   | 8±2     | 3.7±0.5 | 3.1±0.5 | 8±3     | 3.4±0.4 | 2.0±0.2 | 1.1±0.1 | 1.1±0.1 |
|        | θ°                     | -74±3   | 87±3    | 78±3    | 68±3    | 66±3    | -80±3   | -64±3   | -47±3   | -32±2   | -31±2   |
|        | M <sub>xz</sub> (mA/m) | 56±2    | 59±2    | 59±2    | 55±2    | 50±2    | 54±2    | 51±2    | 41±2    | 31±2    | 31±2    |
|        | M <sub>y</sub> (A/m)   | -16±3   | 3±3     | 13±3    | 22±3    | 22±3    | -10±3   | -26±3   | -39±3   | -49±3   | -53±3   |
|        | M(mA/m)                | 58±2    | 59±2    | 61±2    | 59±2    | 55±2    | 55±2    | 57±2    | 56±2    | 58±3    | 61±3    |
| 4      | D (±0.3) cm            | 7.5     | 5,5     | 5,9     | 8,7     | 6,8     | 1,8     | 5,1     | 2,5     | 6,4     | 5,1     |
|        | d(cm)                  | 2.7±0.4 | 4.3±0.8 | 14±6    | 9±3     | 12±6    | 2.8±0.4 | 1.7±0.2 | 1.3±0.1 | 0.3±0.1 | 0.3±0.1 |
|        | θ°                     | -63±3   | -73±3   | 84±3    | 81±3    | 84±3    | -67±3   | -51±3   | -42±2   | -12±2   | -9±2    |
|        | M <sub>xz</sub> (mA/m) | 50±2    | 53±2    | 62±2    | 59±2    | 60±2    | 52±2    | 43±2    | 41±2    | 13±2    | 9±2     |
|        | M <sub>y</sub> (A/m)   | -26±3   | -16±3   | 6±3     | 10±3    | 6±3     | -22±3   | -36±3   | -46±3   | -62±3   | -58±3   |
|        | M(mA/m)                | 56±2    | 55±2    | 62±2    | 60±2    | 61±2    | 57±2    | 56±2    | 62±3    | 63±3    | 59±3    |
|        | D (±0.3) cm            | 1.9     | 2.3     | 9,7     | 4,1     | 3,6     | 2,0     | 4,5     |         | 3,8     |         |
|        | d(cm)                  | 1.3±0.2 | 2.9±0.4 | 3.0±0.5 | 10±5    | 7±2     | 1.4±0.1 | 1.0±0.5 |         | 0.2±0.0 |         |
|        | θ°                     | -53±3   | -68±3   | -70±3   | -83±3   | -80±3   | -52±3   | -46±3   |         | -9±2    |         |

**Table 2.** Computation of the angles  $\theta$ , of the distances  $d$ , and of the magnetization components  $M_y$ ,  $M_{xz}$ , from the field components,  $B_y$ ,  $B_{xz}$ , with the x-sensor axis aligned along the common direction of  $B_{xz}$ ,  $M_{xz}$ . The values inside the colored frames ( $D < d = L \cdot \tan \theta$ ) are computed using the sufficient length relationships (4).

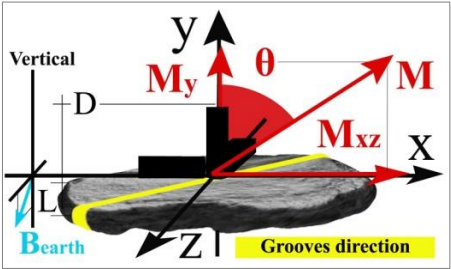

**Vase 6**

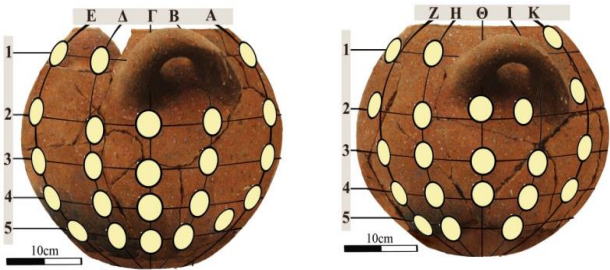

| Vase 6<br>(Base) | M <sup>⊥</sup> | M <sup>//</sup> | M            | γ° |
|------------------|----------------|-----------------|--------------|----|
|                  | (mA/m)         |                 |              |    |
|                  | 42.5<br>±0.2   | 39.8<br>±0.2    | 58.3<br>±0.2 |    |

The computed magnitude,  $M$ , displays similar values in the base and body fragments. For the body fragments, angles,  $\theta$ , change in a systematic way.

| Αγγείο 6               | A | B | Γ | Δ  | E  | Z | H | Θ | I | K  |
|------------------------|---|---|---|----|----|---|---|---|---|----|
| $B_y (\pm 1\text{nT})$ | 5 |   |   | 17 | 13 | 8 | 3 |   |   | -4 |

|   |                       |             |             |             |            |             |             |             |  |             |  |
|---|-----------------------|-------------|-------------|-------------|------------|-------------|-------------|-------------|--|-------------|--|
| 5 | $M_{xz}(\text{mA/m})$ | 43 $\pm$ 2  | 55 $\pm$ 2  | 53 $\pm$ 2  | 54 $\pm$ 2 | 54 $\pm$ 2  | 46 $\pm$ 2  | 41 $\pm$ 2  |  | 9 $\pm$ 2   |  |
|   | $M_y \text{ (A/m)}$   | -33 $\pm$ 3 | -22 $\pm$ 3 | -19 $\pm$ 3 | -6 $\pm$ 3 | -10 $\pm$ 3 | -36 $\pm$ 3 | -40 $\pm$ 3 |  | -59 $\pm$ 4 |  |
|   | $M(\text{mA/m})$      | 54 $\pm$ 2  | 59 $\pm$ 2  | 56 $\pm$ 2  | 55 $\pm$ 2 | 55 $\pm$ 2  | 58 $\pm$ 2  | 57 $\pm$ 3  |  | 59 $\pm$ 4  |  |

**Table 3.** Sensor readings with the x-sensor oriented in the grooves' direction on the body fragments of **vase 6**.

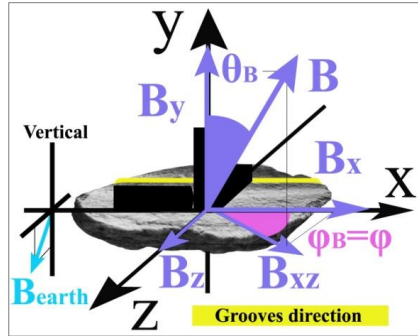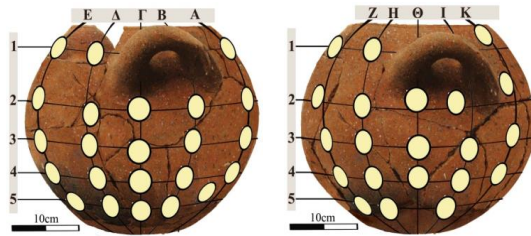

**Vase 6**

The magnitude of field,  $B$ , varies, while the angles,  $\theta_B$ ,  $\phi_B$  change in a systematic way.

|   |                  |       |       |       |       |       |       |       |       |        |        |
|---|------------------|-------|-------|-------|-------|-------|-------|-------|-------|--------|--------|
| 1 | $B_x(\pm 1nT)$   | -21   |       |       | -3    | 3     | 23    | 23    |       |        | 1      |
|   | $B_z(\pm 1nT)$   | 22    |       |       | 7     | 6     | 21    | 28    |       |        | 34     |
|   | $B(\pm 1nT)$     | 31    |       |       | 18    | 14    | 32    | 36    |       |        | 34     |
|   | $\theta_B^\circ$ | 80±2  |       |       | 24±10 | 28±11 | 75±2  | 85±2  |       |        | -83±2  |
|   | $\phi_B^\circ$   | 134±2 |       |       | 113±8 | 63±9  | 42±2  | 51±2  |       |        | 88±2   |
| 2 | $B_y(\pm 1nT)$   | 1     | 7     | 14    | 17    | 15    | 2     | -2    | -7    | -7     | -13    |
|   | $B_x(\pm 1nT)$   | -26   | -22   | -17   | -5    | 5     | 25    | 24    | 15    | 6      | -1     |
|   | $B_z(\pm 1nT)$   | 29    | 21    | 23    | 20    | 23    | 27    | 32    | 29    | 28     | 31     |
|   | $B(\pm 1nT)$     | 39    | 31    | 32    | 27    | 28    | 37    | 40    | 33    | 30     | 33     |
|   | $\theta_B^\circ$ | 88±1  | 76±2  | 64±2  | 51±3  | 58±3  | 87±2  | -87±1 | -77±2 | -76±2  | -68±2  |
| 3 | $B_y(\pm 1nT)$   | -5    | 2     | 4     | 8     | 7     | -4    | -7    | -12   | -17    | -17    |
|   | $B_x(\pm 1nT)$   | -27   | -20   | -13   | -3    | 2     | 26    | 25    | 15    | 5      | -5     |
|   | $B_z(\pm 1nT)$   | 27    | 25    | 26    | 33    | 34    | 27    | 25    | 18    | 20     | 17     |
|   | $B(\pm 1nT)$     | 39    | 32    | 29    | 34    | 35    | 38    | 36    | 26    | 27     | 24     |
|   | $\theta_B^\circ$ | -82±2 | 86±2  | 82±2  | 76±2  | 78±2  | -84±2 | -78±2 | -64±3 | -51±3  | -46±4  |
| 4 | $B_y(\pm 1nT)$   | -7    | -5    | 2     | 4     | 1     | -7    | -12   | -14   | -19    | -18    |
|   | $B_x(\pm 1nT)$   | -25   | -26   | -11   | -1    | 5     | 23    | 21    | 19    | 1      | -2     |
|   | $B_z(\pm 1nT)$   | 24    | 28    | 31    | 38    | 38    | 22    | 14    | 14    | 3      | 5      |
|   | $B(\pm 1nT)$     | 35    | 39    | 33    | 38    | 38    | 33    | 28    | 27    | 19     | 19     |
|   | $\theta_B^\circ$ | -78±2 | -82±2 | 86±2  | 84±2  | 88±1  | -77±2 | -65±2 | -60±3 | -9±25  | -17±15 |
| 5 | $B_y(\pm 1nT)$   | -12   | -7    | -5    | -2    | -3    | -11   | -13   |       | -16    |        |
|   | $B_x(\pm 1nT)$   | -22   | -19   | -11   | -8    | 7     | 23    | 18    |       | 3      |        |
|   | $B_z(\pm 1nT)$   | 14    | 20    | 28    | 39    | 33    | 16    | 10    |       | -1     |        |
|   | $B(\pm 1nT)$     | 29    | 29    | 31    | 40    | 34    | 30    | 24    |       | 16     |        |
|   | $\theta_B^\circ$ | -66±2 | -75±2 | -80±2 | -87±1 | -85±2 | -69±2 | -58±3 |       | -11±25 |        |
|   | $\phi_B^\circ$   | 148±2 | 134±2 | 111±2 | 102±1 | 78±2  | 35±2  | 29±3  |       | 342±18 |        |

**Table 4.** Computation of the magnetization components,  $M_i$  ( $i=x,y,z$ ), of the magnitude  $M$  and of the angles  $\theta, \phi$ , from sensor readings with the x-sensor oriented in the grooves direction in body fragments of **vase 6**.

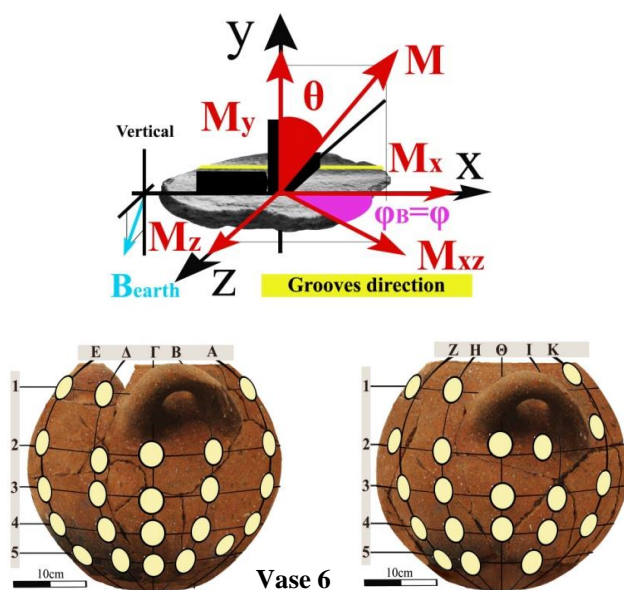

The computed magnitude,  $M$ , displays similar values in the base and body fragments, which is a criterion for finding ceramic fragments of the same vase from archaeological excavations. The angles,  $\theta, \phi$ , change in a systematic way.

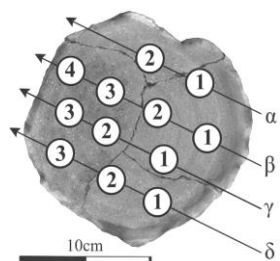

| Vase 6 | $M^*$     | $M^{\prime\prime}$ | $M$       | $\gamma^\circ$ |
|--------|-----------|--------------------|-----------|----------------|
| (Base) | 42.5      | 39.8               | 58.3      | 43.3           |
| (mA/m) | $\pm 0.2$ | $\pm 0.2$          | $\pm 0.2$ | $\pm 0.3$      |

| Vase 6 | A              | B     | Г     | Δ     | E     | Z     | H     | Θ     | I     | K      |
|--------|----------------|-------|-------|-------|-------|-------|-------|-------|-------|--------|
| 1      | $M_y$ (mA/m)   | 16±3  |       | 64±4  | 50±4  | 26±3  | 10±3  |       |       | -13±3  |
|        | $M_x$ (mA/m)   | -34±2 |       | -8±3  | 8±3   | 38±2  | 37±2  |       |       | 2±2    |
|        | $M_z$ (mA/m)   | 35±2  |       | 18±3  | 16±3  | 35±2  | 45±2  |       |       | 54±2   |
|        | $M$ (mA/m)     | 51±2  |       | 67±4  | 53±4  | 58±2  | 58±2  |       |       | 56±2   |
|        | $\theta^\circ$ | 72±4  |       | 17±17 | 20±18 | 63±4  | 81±3  |       |       | -77±3  |
|        | $\phi^\circ$   | 134±2 |       | 113±8 | 63±9  | 42±2  | 51±2  |       |       | 88±2   |
| 2      | $M_y$ (mA/m)   | 3±4   | 22±3  | 42±3  | 53±4  | 47±3  | 6±4   | -22±4 | -22±4 | -39±3  |
|        | $M_x$ (mA/m)   | -41±2 | -35±2 | -28±2 | -9±2  | 9±2   | 40±2  | 38±2  | 24±2  | -2±2   |
|        | $M_z$ (mA/m)   | 46±2  | 34±2  | 39±2  | 35±2  | 41±2  | 43±2  | 51±2  | 47±2  | 51±2   |
|        | $M$ (mA/m)     | 62    | 53±2  | 64±2  | 63±4  | 63±3  | 59±2  | 64±2  | 57±2  | 64±2   |
|        | $\theta^\circ$ | 87±4  | 65±4  | 49±4  | 34±8  | 42±5  | 84±4  | -84±4 | -67±5 | -64±6  |
|        | $\phi^\circ$   | 132±1 | 136±2 | 126±2 | 104±3 | 78±2  | 47±2  | 53±1  | 63±2  | 78±2   |
| 3      | $M_y$ (mA/m)   | -16±3 | 6±4   | 13±4  | 26±4  | 22±4  | -13±4 | -22±3 | -35±3 | -53±3  |
|        | $M_x$ (mA/m)   | -43±2 | -32±2 | -21±2 | -5±2  | 3±2   | 41±2  | 40±2  | 25±2  | 9±2    |
|        | $M_z$ (mA/m)   | 43±2  | 40±2  | 42±2  | 53±2  | 55±2  | 43±2  | 40±2  | 30±2  | 35±2   |
|        | $M$ (mA/m)     | 63±2  | 51±2  | 48±2  | 59±2  | 60±2  | 61±2  | 61±2  | 52±2  | 63±3   |
|        | $\theta^\circ$ | -75±3 | 83±5  | 75±5  | 64±5  | 68±4  | -78±4 | -68±3 | -47±5 | -34±6  |
|        | $\phi^\circ$   | 135±2 | 129±2 | 117±2 | 95±2  | 87±2  | 46±2  | 45±2  | 50±2  | 76±3   |
| 4      | $M_y$ (mA/m)   | -22±3 | -16±3 | 6±4   | 13±4  | 3±4   | -22±4 | -36±3 | -43±3 | -58±3  |
|        | $M_x$ (mA/m)   | -40±2 | -41±2 | -18±2 | -2±2  | 8±2   | 37±2  | 35±2  | 33±3  | 2±2    |
|        | $M_z$ (mA/m)   | 39±2  | 45±2  | 49±2  | 60±2  | 60±2  | 36±2  | 23±2  | 24±2  | 6±2    |
|        | $M$ (mA/m)     | 60±2  | 63±2  | 53±2  | 62±2  | 61±2  | 56±2  | 55±2  | 59±3  | 62±3   |
|        | $\theta^\circ$ | -68±3 | -75±3 | 83±5  | 78±4  | 87±4  | -67±5 | -50±5 | -44±5 | -6±44  |
|        | $\phi^\circ$   | 136±2 | 133±2 | 110±2 | 92±2  | 83±1  | 44±2  | 34±2  | 36±2  | 72±18  |
| 5      | $M_y$ (mA/m)   | -36±3 | -22±4 | -16±3 | -6±4  | -10±4 | -33±3 | -40±3 |       | -55±4  |
|        | $M_x$ (mA/m)   | -38±2 | -31±2 | -18±2 | -13±2 | 11±2  | 39±2  | 32±2  |       | 7±2    |
|        | $M_z$ (mA/m)   | 24±2  | 32±2  | 45±2  | 62±2  | 53±2  | 27±2  | 18±2  |       | -2±2   |
|        | $M$ (mA/m)     | 57±2  | 50±2  | 51±2  | 64±2  | 55±2  | 58±2  | 54±3  |       | 55±4   |
|        | $\theta^\circ$ | -51±4 | 27±6  | -72±4 | -84±4 | -80±5 | -56±4 | -43±6 |       | -7±42  |
|        | $\phi^\circ$   | 148±2 | 134±2 | 111±2 | 102±1 | 78±2  | 35±2  | 29±3  |       | 342±18 |

| Vase 1                                                                            |                          |                                                                                                                                                                                                     |      |          |          |      |      |      |          |       |                   |                          |           |           |           |         |
|-----------------------------------------------------------------------------------|--------------------------|-----------------------------------------------------------------------------------------------------------------------------------------------------------------------------------------------------|------|----------|----------|------|------|------|----------|-------|-------------------|--------------------------|-----------|-----------|-----------|---------|
| 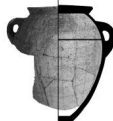 |                          | <table><tr><th><math>\alpha_y^I</math> (cm)</th><th><math>\alpha_{x,z}^{II}</math> (cm)</th><th><math>\lambda</math></th></tr><tr><td>0,82±0,04</td><td>1,42±0,02</td><td>2,0±0,1</td></tr></table> |      |          |          |      |      |      |          |       | $\alpha_y^I$ (cm) | $\alpha_{x,z}^{II}$ (cm) | $\lambda$ | 0,82±0,04 | 1,42±0,02 | 2,0±0,1 |
| $\alpha_y^I$ (cm)                                                                 | $\alpha_{x,z}^{II}$ (cm) | $\lambda$                                                                                                                                                                                           |      |          |          |      |      |      |          |       |                   |                          |           |           |           |         |
| 0,82±0,04                                                                         | 1,42±0,02                | 2,0±0,1                                                                                                                                                                                             |      |          |          |      |      |      |          |       |                   |                          |           |           |           |         |
|                                                                                   |                          | A                                                                                                                                                                                                   | B    | $\Gamma$ | $\Delta$ | E    | Z    | H    | $\Theta$ | I     |                   |                          |           |           |           |         |
| 1                                                                                 | D (±0.3) cm              | 5.2                                                                                                                                                                                                 | 9.5  | 15.3     | 29.5     | 23.8 | 17.1 | 11.3 | 3.7      |       |                   |                          |           |           |           |         |
|                                                                                   | L (±0.1) cm              | 1,0                                                                                                                                                                                                 | 1.1  | 1.1      | 1.2      | 1.1  | 1.1  | 1.0  | 1.1      |       |                   |                          |           |           |           |         |
|                                                                                   | $B_{xz}$ (±1) nT         | 50                                                                                                                                                                                                  | 33   | 18       | 2        | 15   | 40   | 55   | 80       |       |                   |                          |           |           |           |         |
|                                                                                   | $B_y$ (±1) nT            | 23                                                                                                                                                                                                  | 33   | 33       | 36       | 31   | 30   | 25   | 7        |       |                   |                          |           |           |           |         |
|                                                                                   | B (±1) nT                | 55                                                                                                                                                                                                  | 47   | 38       | 36       | 34   | 50   | 60   | 80       |       |                   |                          |           |           |           |         |
|                                                                                   | $\theta_B^\circ$         | 65±1                                                                                                                                                                                                | 45±1 | 29±2     | 3±2      | 26±2 | 53±1 | 66±1 | 85±1     |       |                   |                          |           |           |           |         |
| 2                                                                                 | D (±0.3) cm              | 5.3                                                                                                                                                                                                 | 10.7 | 16.7     | 18.9     | 24.3 | 18.3 | 13.1 | 3.5      |       |                   |                          |           |           |           |         |
|                                                                                   | L (±0.1) cm              | 1.1                                                                                                                                                                                                 | 1.1  | 1.2      | 1.2      | 1.3  | 1.3  | 1.2  | 1.2      |       |                   |                          |           |           |           |         |
|                                                                                   | $B_{xz}$ (±1) nT         | 67                                                                                                                                                                                                  | 33   | 20       | 9        | 25   | 38   | 64   | 83       |       |                   |                          |           |           |           |         |
|                                                                                   | $B_y$ (±1) nT            | 22                                                                                                                                                                                                  | 31   | 35       | 35       | 33   | 31   | 23   | 5        |       |                   |                          |           |           |           |         |
|                                                                                   | B (±1) nT                | 71                                                                                                                                                                                                  | 45   | 40       | 36       | 41   | 49   | 68   | 83       |       |                   |                          |           |           |           |         |
|                                                                                   | $\theta_B^\circ$         | 72±1                                                                                                                                                                                                | 47±1 | 30±1     | 14±2     | 37±1 | 51±1 | 70±1 | 87±1     |       |                   |                          |           |           |           |         |
| 3                                                                                 | D (±0.3) cm              | 6.6                                                                                                                                                                                                 | 3.0  | 3.8      | 22.8     | 29.5 | 19.9 | 15.4 | 2.9      |       |                   |                          |           |           |           |         |
|                                                                                   | L (±0.1) cm              | 1.2                                                                                                                                                                                                 | 1.2  | 1.3      | 1.2      | 1.3  | 1.4  | 1.3  | 1.3      |       |                   |                          |           |           |           |         |
|                                                                                   | $B_{xz}$ (±1) nT         | 71                                                                                                                                                                                                  | 37   | 22       | 16       | 31   | 48   | 73   | 81       |       |                   |                          |           |           |           |         |
|                                                                                   | $B_y$ (±1) nT            | 20                                                                                                                                                                                                  | 32   | 35       | 34       | 31   | 28   | 18   | 2        |       |                   |                          |           |           |           |         |
|                                                                                   | B (±1) nT                | 74                                                                                                                                                                                                  | 49   | 41       | 38       | 44   | 56   | 75   | 81       |       |                   |                          |           |           |           |         |
|                                                                                   | $\theta_B^\circ$         | 74±1                                                                                                                                                                                                | 49±1 | 32±1     | 25±2     | 45±1 | 60±1 | 76±1 | 89±1     |       |                   |                          |           |           |           |         |
| 4                                                                                 | D (±0.3) cm              | 7.2                                                                                                                                                                                                 | 4.4  | 8.8      | 6.7      | 5.9  | 22.7 | 15.9 | 3.3      | 10.3  |                   |                          |           |           |           |         |
|                                                                                   | L (±0.1) cm              | 1.2                                                                                                                                                                                                 | 1.3  | 1.4      | 1.3      | 1.4  | 1.4  | 1.4  | 1.4      | 1.4   |                   |                          |           |           |           |         |
|                                                                                   | $B_{xz}$ (±1) nT         | 75                                                                                                                                                                                                  | 55   | 37       | 32       | 33   | 54   | 70   | 83       | 82    |                   |                          |           |           |           |         |
|                                                                                   | $B_y$ (±1) nT            | 17                                                                                                                                                                                                  | 25   | 31       | 31       | 33   | 26   | 19   | −5       | −9    |                   |                          |           |           |           |         |
|                                                                                   | B (±1) nT                | 77                                                                                                                                                                                                  | 60   | 48       | 45       | 47   | 60   | 73   | 83       | 81    |                   |                          |           |           |           |         |
|                                                                                   | $\theta_B^\circ$         | 77±1                                                                                                                                                                                                | 66±1 | 50±1     | 46±1     | 45±1 | 64±1 | 75±1 | −87±1    | −83±1 |                   |                          |           |           |           |         |

**Table 5a.** Measurements D, L, and sensor readings of  $B_i$  ( $i=x,z,y$ ), with the x-sensor aligned along the common direction of  $B_{xz}$ ,  $M_{xz}$ , on the body fragments of **vase 1**.

|   |                     |            |            |            |            |            |            |            |             |             |
|---|---------------------|------------|------------|------------|------------|------------|------------|------------|-------------|-------------|
| 5 | D ( $\pm 0.3$ ) cm  | 2.8        | 7.9        | 2.5        | 12.8       | 11.4       | 24.0       | 11.7       | 6.1         | 7.9         |
|   | L ( $\pm 0.1$ ) cm  | 1.3        | 1.3        | 1.3        | 1.3        | 1.5        | 1.4        | 1.4        | 1.5         | 1.5         |
|   | $B_{xz} (\pm 1)$ nT | 78         | 63         | 44         | 37         | 44         | 66         | 75         | 81          | 79          |
|   | $B_y (\pm 1)$ nT    | 15         | 24         | 32         | 32         | 32         | 22         | 15         | -6          | -9          |
|   | B ( $\pm 1$ ) nT    | 79         | 67         | 54         | 49         | 54         | 70         | 76         | 81          | 80          |
|   | $\theta_B^\circ$    | 79 $\pm 1$ | 69 $\pm 1$ | 54 $\pm 1$ | 49 $\pm 1$ | 54 $\pm 1$ | 72 $\pm 1$ | 79 $\pm 1$ | -86 $\pm 1$ | -84 $\pm 1$ |

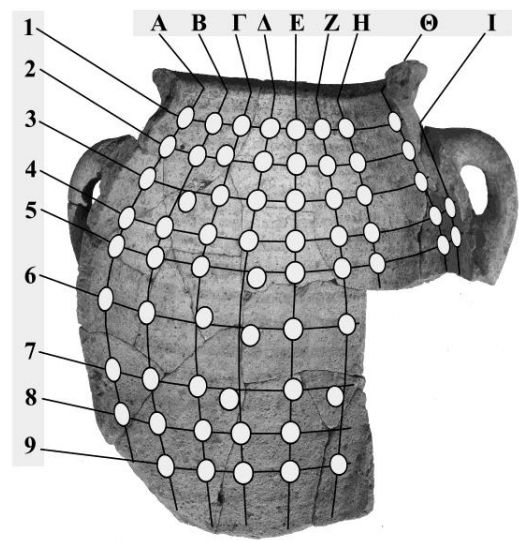



**Table 5b.** Measurements D, L, and sensor readings of  $B_i$  ( $i=xz,y$ ), with the x-sensor aligned along the common direction of  $B_{xz}$ ,  $M_{xz}$ , on the body fragments of **vase 1**.

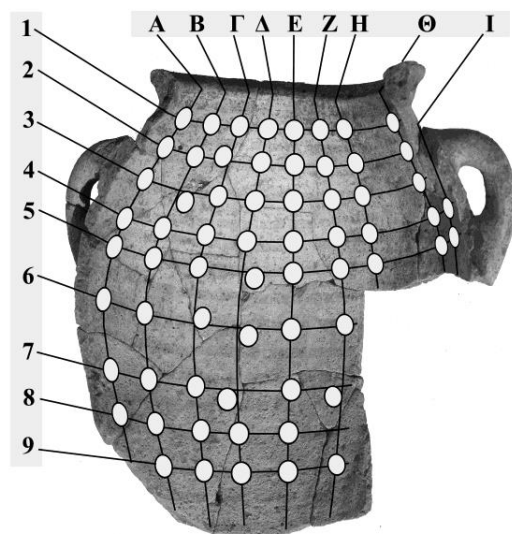

| Vase 1 |                     | A          | B          | Γ          | Δ          | E          | Z          | H | Θ | I |
|--------|---------------------|------------|------------|------------|------------|------------|------------|---|---|---|
| 6      | D ( $\pm 0.3$ ) cm  | 6.9        | 3.2        | 12,7       | 6.7        | 8.2        | 8.0        |   |   |   |
|        | L ( $\pm 0.1$ ) cm  | 1.6        | 1.5        | 1,4        | 1.5        | 1.6        | 1.7        |   |   |   |
|        | $B_{xz} (\pm 1)$ nT | 76         | 70         | 63         | 58         | 68         | 79         |   |   |   |
|        | $B_y (\pm 1)$ nT    | 12         | 17         | 27         | 27         | 21         | 13         |   |   |   |
|        | B ( $\pm 1$ ) nT    | 77         | 72         | 69         | 64         | 71         | 80         |   |   |   |
|        | $\theta_B^\circ$    | 81 $\pm 1$ | 76 $\pm 1$ | 67 $\pm 1$ | 65 $\pm 1$ | 73 $\pm 1$ | 81 $\pm 1$ |   |   |   |
| 7      | D ( $\pm 0.3$ ) cm  | 7.1        | 4.9        | 5.4        | 11.8       | 3.3        | 3.6        |   |   |   |
|        | L ( $\pm 0.1$ ) cm  | 1.7        | 1.7        | 1.8        | 1.7        | 1.8        | 1.7        |   |   |   |
|        | $B_{xz} (\pm 1)$ nT | 85         | 78         | 73         | 66         | 71         | 81         |   |   |   |
|        | $B_y (\pm 1)$ nT    | 2          | 12         | 19         | 22         | 20         | 8          |   |   |   |
|        | B ( $\pm 1$ ) nT    | 85         | 79         | 75         | 70         | 74         | 81         |   |   |   |
|        | $\theta_B^\circ$    | 89 $\pm 1$ | 81 $\pm 1$ | 75 $\pm 1$ | 72 $\pm 1$ | 74 $\pm 1$ | 84 $\pm 1$ |   |   |   |
| 8      | D ( $\pm 0.3$ ) cm  | 7.4        | 4.5        | 10.9       | 8.8        | 9.6        | 5.5        |   |   |   |
|        | L ( $\pm 0.1$ ) cm  | 1.8        | 1.8        | 1.9        | 1.9        | 1.9        | 2.0        |   |   |   |
|        | $B_{xz} (\pm 1)$ nT | 86         | 76         | 76         | 69         | 73         | 80         |   |   |   |
|        | $B_y (\pm 1)$ nT    | 1          | 13         | 17         | 18         | 19         | 8          |   |   |   |
|        | B ( $\pm 1$ ) nT    | 86         | 77         | 78         | 71         | 75         | 80         |   |   |   |
|        | $\theta_B^\circ$    | 89 $\pm 1$ | 80 $\pm 1$ | 77 $\pm 1$ | 75 $\pm 1$ | 75 $\pm 1$ | 84 $\pm 1$ |   |   |   |
| 9      | D ( $\pm 0.3$ ) cm  |            | 10.2       | 16.9       | 15.2       | 13.8       | 11.2       |   |   |   |
|        | L ( $\pm 0.1$ ) cm  |            | 1.9        | 2.0        | 2.1        | 2.0        | 2.0        |   |   |   |
|        | $B_{xz} (\pm 1)$ nT |            | 79         | 79         | 76         | 78         | 82         |   |   |   |
|        | $B_y (\pm 1)$ nT    |            | 5          | 14         | 16         | 14         | 4          |   |   |   |
|        | B ( $\pm 1$ ) nT    |            | 79         | 80         | 78         | 79         | 82         |   |   |   |
|        | $\theta_B^\circ$    |            | 86 $\pm 1$ | 80 $\pm 1$ | 78 $\pm 1$ | 80 $\pm 1$ | 87 $\pm 1$ |   |   |   |

| Vase 1 |                       | A    | B    | $\Gamma$ | $\Delta$ | E     | Z     | H     | $\Theta$ | I     |
|--------|-----------------------|------|------|----------|----------|-------|-------|-------|----------|-------|
| 1      | $B_y(\pm 1\text{nT})$ | 23   | 32   | 32       | 35       | 31    | 29    | 25    | 7        |       |
|        | $B_x(\pm 1\text{nT})$ | 47   | 33   | 18       | -3       | -19   | -41   | -57   | -60      |       |
|        | $B_z(\pm 1\text{nT})$ | 16   | 7    | 3        | -1       | 5     | 8     | 23    | 51       |       |
|        | $B(\pm 1\text{nT})$   | 55   | 46   | 37       | 35       | 37    | 51    | 66    | 79       |       |
|        | $\theta_B^\circ$      | 65±1 | 47±1 | 30±2     | 5±2      | 32±2  | 55±1  | 68±1  | 85±1     |       |
|        | $\phi_B^\circ$        | 19±1 | 12±2 | 9±3      | 198±18   | 165±3 | 169±1 | 158±1 | 140±1    |       |
| 2      | $B_y(\pm 1\text{nT})$ | 22   | 30   | 34       | 34       | 34    | 30    | 23    | 5        |       |
|        | $B_x(\pm 1\text{nT})$ | 60   | 29   | 18       | -3       | -22   | -39   | -57   | -62      |       |
|        | $B_z(\pm 1\text{nT})$ | 31   | 9    | 11       | 9        | 11    | 14    | 29    | 49       |       |
|        | $B(\pm 1\text{nT})$   | 71   | 43   | 40       | 35       | 42    | 51    | 68    | 72       |       |
|        | $\theta_B^\circ$      | 72±1 | 45±1 | 32±1     | 16±2     | 36±1  | 54±1  | 70±1  | 86±1     |       |
|        | $\phi_B^\circ$        | 27±1 | 17±2 | 31±3     | 108±6    | 153±2 | 160±1 | 153±1 | 142±1    |       |
| 3      | $B_y(\pm 1\text{nT})$ | 20   | 32   | 36       | 35       | 32    | 28    | 17    | 3        |       |
|        | $B_x(\pm 1\text{nT})$ | 62   | 31   | 13       | -3       | -20   | -47   | -60   | -62      |       |
|        | $B_z(\pm 1\text{nT})$ | 40   | 25   | 17       | 17       | 21    | 29    | 38    | 47       |       |
|        | $B(\pm 1\text{nT})$   | 76   | 51   | 42       | 39       | 43    | 62    | 73    | 78       |       |
|        | $\theta_B^\circ$      | 75±1 | 51±1 | 31±1     | 26±1     | 42±1  | 63±1  | 77±1  | 88±1     |       |
|        | $\phi_B^\circ$        | 33±1 | 39±1 | 53±3     | 100±3    | 134±2 | 148±1 | 148±1 | 143±1    |       |
| 4      | $B_y(\pm 1\text{nT})$ | 17   | 24   | 32       | 32       | 33    | 25    | 19    | -6       | -9    |
|        | $B_x(\pm 1\text{nT})$ | 59   | 41   | 19       | -2       | -21   | -40   | -58   | -63      | -56   |
|        | $B_z(\pm 1\text{nT})$ | 42   | 37   | 30       | 33       | 29    | 31    | 40    | 51       | 50    |
|        | $B(\pm 1\text{nT})$   | 74   | 60   | 48       | 46       | 49    | 56    | 73    | 81       | 76    |
|        | $\theta_B^\circ$      | 77±1 | 67±1 | 48±1     | 46±1     | 47±1  | 64±1  | 75±1  | -86±1    | -83±1 |
|        | $\phi_B^\circ$        | 35±1 | 42±1 | 58±2     | 93±2     | 126±2 | 142±1 | 145±1 | 141±1    | 139±1 |
|        | $B_y(\pm 1\text{nT})$ | 15   | 23   | 32       | 32       | 32    | 22    | 15    | -6       | -10   |
|        | $B_x(\pm 1\text{nT})$ | 54   | 48   | 21       | -7       | -21   | -48   | -58   | -68      | -61   |

**Table 6a.** Sensor readings of  $B_i$  ( $i=x,y,z$ ), with the  $x$ -sensor oriented in the grooves' direction on the body fragments of **vase 1**.

|   |                  |      |      |      |       |       |       |       |       |       |
|---|------------------|------|------|------|-------|-------|-------|-------|-------|-------|
| 5 | $B_z(\pm 1nT)$   | 41   | 47   | 40   | 35    | 41    | 42    | 47    | 52    | 51    |
|   | $B(\pm 1nT)$     | 69   | 71   | 55   | 48    | 56    | 67    | 76    | 86    | 80    |
|   | $\theta_B^\circ$ | 78±1 | 71±1 | 55±1 | 48±1  | 55±1  | 71±1  | 79±1  | -86±1 | -83±1 |
|   | $\phi_B^\circ$   | 37±1 | 44±1 | 62±1 | 101±1 | 117±1 | 139±1 | 141±1 | 143±1 | 140±1 |

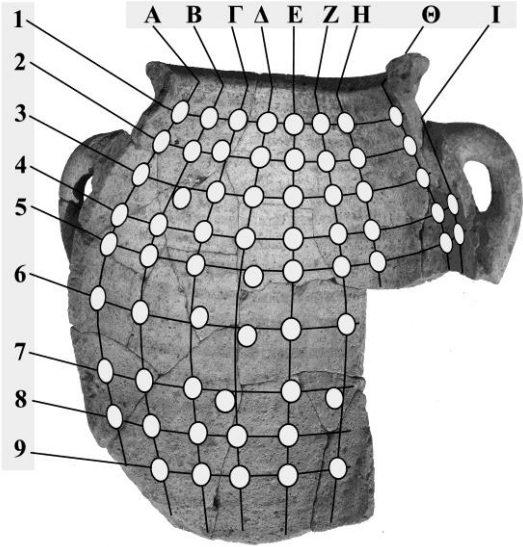

**Table 6b.** Indicative sensor readings of  $B_i$  ( $i=x,y,z$ ), with the x-sensor oriented in the grooves' direction on the body fragments of **vase 1**.

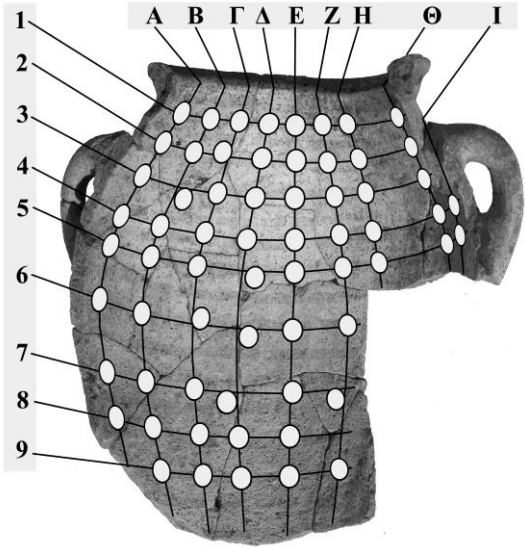

| Vase 1                                                                             |                             |      |      |      |      |       |       |   |   |   |
|------------------------------------------------------------------------------------|-----------------------------|------|------|------|------|-------|-------|---|---|---|
| 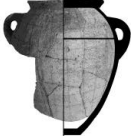 |                             | A    | B    | Γ    | Δ    | E     | Z     | H | Θ | I |
| 6                                                                                  | B <sub>y</sub> (±1nT)       | 11   | 18   | 26   | 27   | 22    | 14    |   |   |   |
|                                                                                    | B <sub>x</sub> (±1nT)       | 55   | 42   | 21   | -1   | -28   | -48   |   |   |   |
|                                                                                    | B <sub>z</sub> (±1nT)       | 51   | 57   | 54   | 56   | 60    | 53    |   |   |   |
|                                                                                    | B(±1nT)                     | 76   | 76   | 64   | 62   | 70    | 73    |   |   |   |
|                                                                                    | θ <sub>B</sub> <sup>°</sup> | 82±1 | 76±1 | 66±1 | 64±1 | 72±1  | 79±1  |   |   |   |
|                                                                                    | φ <sub>B</sub> <sup>°</sup> | 43±1 | 54±1 | 69±1 | 91±1 | 115±1 | 132±1 |   |   |   |
| 7                                                                                  | B <sub>y</sub> (±1nT)       | 2    | 12   | 18   | 21   | 20    | 8     |   |   |   |
|                                                                                    | B <sub>x</sub> (±1nT)       | 65   | 48   | 20   | -5   | -25   | -52   |   |   |   |
|                                                                                    | B <sub>z</sub> (±1nT)       | 57   | 63   | 63   | 61   | 61    | 61    |   |   |   |
|                                                                                    | B(±1nT)                     | 86   | 81   | 69   | 65   | 69    | 84    |   |   |   |
|                                                                                    | θ <sub>B</sub> <sup>°</sup> | 89±1 | 81±1 | 75±1 | 71±1 | 73±1  | 84±1  |   |   |   |
|                                                                                    | φ <sub>B</sub> <sup>°</sup> | 41±1 | 53±1 | 72±1 | 95±1 | 112±1 | 130±1 |   |   |   |
| 8                                                                                  | B <sub>y</sub> (±1nT)       | 1    | 12   | 16   | 18   | 18    | 9     |   |   |   |
|                                                                                    | B <sub>x</sub> (±1nT)       | 62   | 47   | 20   | 1    | -27   | -50   |   |   |   |
|                                                                                    | B <sub>z</sub> (±1nT)       | 56   | 71   | 67   | 74   | 71    | 65    |   |   |   |
|                                                                                    | B(±1nT)                     | 84   | 82   | 72   | 76   | 78    | 82    |   |   |   |
|                                                                                    | θ <sub>B</sub> <sup>°</sup> | 89±1 | 82±1 | 77±1 | 76±1 | 77±1  | 84±1  |   |   |   |
|                                                                                    | φ <sub>B</sub> <sup>°</sup> | 42±1 | 56±1 | 73±1 | 89±1 | 111±1 | 128±1 |   |   |   |
| 9                                                                                  | B <sub>y</sub> (±1nT)       |      | 6    | 14   | 16   | 15    | 4     |   |   |   |
|                                                                                    | B <sub>x</sub> (±1nT)       |      | 44   | 27   | -4   | -29   | -51   |   |   |   |
|                                                                                    | B <sub>z</sub> (±1nT)       |      | 64   | 72   | 75   | 72    | 66    |   |   |   |
|                                                                                    | B(±1nT)                     |      | 86   | 78   | 77   | 79    | 84    |   |   |   |
|                                                                                    | θ <sub>B</sub> <sup>°</sup> |      | 86±1 | 80±1 | 78±1 | 79±1  | 87±1  |   |   |   |
|                                                                                    | φ <sub>B</sub> <sup>°</sup> |      | 55±1 | 71±1 | 93±1 | 112±1 | 128±1 |   |   |   |

| Vase 2                                                                              |                         |   |   |   |   |   |      |      |      | $\alpha_y^{\perp}$<br>(cm) | $\alpha_{x,z}^{//}$<br>(cm) | $\lambda$ |
|-------------------------------------------------------------------------------------|-------------------------|---|---|---|---|---|------|------|------|----------------------------|-----------------------------|-----------|
|  |                         |   |   |   |   |   |      |      |      | 1,15±<br>0,053             | 1,66±<br>0,05               | 2,0±0,1   |
|                                                                                     |                         | A | B | Г | Δ | E | Z    | H    | Θ    | I                          |                             |           |
| 1                                                                                   | D (±0.3) cm             |   |   |   |   |   | 5.7  | 2.5  | 3.4  |                            |                             |           |
|                                                                                     | L (±0.1) cm             |   |   |   |   |   | 0.9  | 0.8  | 0.8  |                            |                             |           |
|                                                                                     | B <sub>xz</sub> (±1) nT |   |   |   |   |   | 21   | 16   | 28   |                            |                             |           |
|                                                                                     | B <sub>y</sub> (±1) nT  |   |   |   |   |   | 37   | 28   | 33   |                            |                             |           |
|                                                                                     | B (±1) nT               |   |   |   |   |   | 43   | 32   | 43   |                            |                             |           |
|                                                                                     | θ <sub>B</sub> °        |   |   |   |   |   | 30±1 | 30±2 | 40±1 |                            |                             |           |
| 2                                                                                   | D (±0.3) cm             |   |   |   |   |   | 9.3  |      |      | 2.0                        |                             |           |
|                                                                                     | L (±0.1) cm             |   |   |   |   |   | 1.0  |      |      | 1.1                        |                             |           |
|                                                                                     | B <sub>xz</sub> (±1) nT |   |   |   |   |   | 35   |      |      | 71                         |                             |           |
|                                                                                     | B <sub>y</sub> (±1) nT  |   |   |   |   |   | 38   |      |      | 32                         |                             |           |
|                                                                                     | B (±1) nT               |   |   |   |   |   | 52   |      |      | 78                         |                             |           |
|                                                                                     | θ <sub>B</sub> °        |   |   |   |   |   | 43±1 |      |      | 66±1                       |                             |           |
| 3                                                                                   | D (±0.3) cm             |   |   |   |   |   | 13.1 | 11.9 | 10.6 | 3.7                        |                             |           |
|                                                                                     | L (±0.1) cm             |   |   |   |   |   | 1.2  | 1.3  | 1.1  | 1.2                        |                             |           |
|                                                                                     | B <sub>xz</sub> (±1) nT |   |   |   |   |   | 46   | 38   | 49   | 89                         |                             |           |
|                                                                                     | B <sub>y</sub> (±1) nT  |   |   |   |   |   | 38   | 42   | 38   | 24                         |                             |           |
|                                                                                     | B (±1) nT               |   |   |   |   |   | 60   | 57   | 62   | 92                         |                             |           |
|                                                                                     | θ <sub>B</sub> °        |   |   |   |   |   | 50±1 | 42±1 | 52±1 | 75±1                       |                             |           |
| 4                                                                                   | D (±0.3) cm             |   |   |   |   |   | 2.8  | 2.6  | 6.4  | 1.7                        |                             |           |
|                                                                                     | L (±0.1) cm             |   |   |   |   |   | 1.5  | 1.6  | 1.5  | 1.5                        |                             |           |
|                                                                                     | B <sub>xz</sub> (±1) nT |   |   |   |   |   | 73   | 73   | 77   | 92                         |                             |           |
|                                                                                     | B <sub>y</sub> (±1) nT  |   |   |   |   |   | 37   | 33   | 28   | 20                         |                             |           |
|                                                                                     | B (±1) nT               |   |   |   |   |   | 82   | 80   | 82   | 94                         |                             |           |
|                                                                                     | θ <sub>B</sub> °        |   |   |   |   |   | 63±1 | 66±1 | 70±1 | 78±1                       |                             |           |
|                                                                                     | D (±0.3) cm             |   |   |   |   |   | 6.7  | 2.6  | 10.4 | 2.3                        |                             |           |

**Table 7a.** Measurements D, L, and sensor readings of  $B_i$  ( $i=xz,y$ ), with the x-sensor aligned along the common direction of  $B_{xz}$ ,  $M_{xz}$ , on the body fragments of **vase 2**.

|   |                     |  |  |  |  |  |            |            |            |            |
|---|---------------------|--|--|--|--|--|------------|------------|------------|------------|
| 5 | L ( $\pm 0.1$ ) cm  |  |  |  |  |  | 1.6        | 1.6        | 1.4        | 1.3        |
|   | $B_{xz} (\pm 1)$ nT |  |  |  |  |  | 88         | 73         | 90         | 99         |
|   | $B_y (\pm 1)$ nT    |  |  |  |  |  | 35         | 33         | 26         | 15         |
|   | $B (\pm 1)$ nT      |  |  |  |  |  | 95         | 80         | 94         | 100        |
|   | $\theta_B^\circ$    |  |  |  |  |  | 68 $\pm$ 1 | 66 $\pm$ 1 | 74 $\pm$ 1 | 81 $\pm$ 1 |

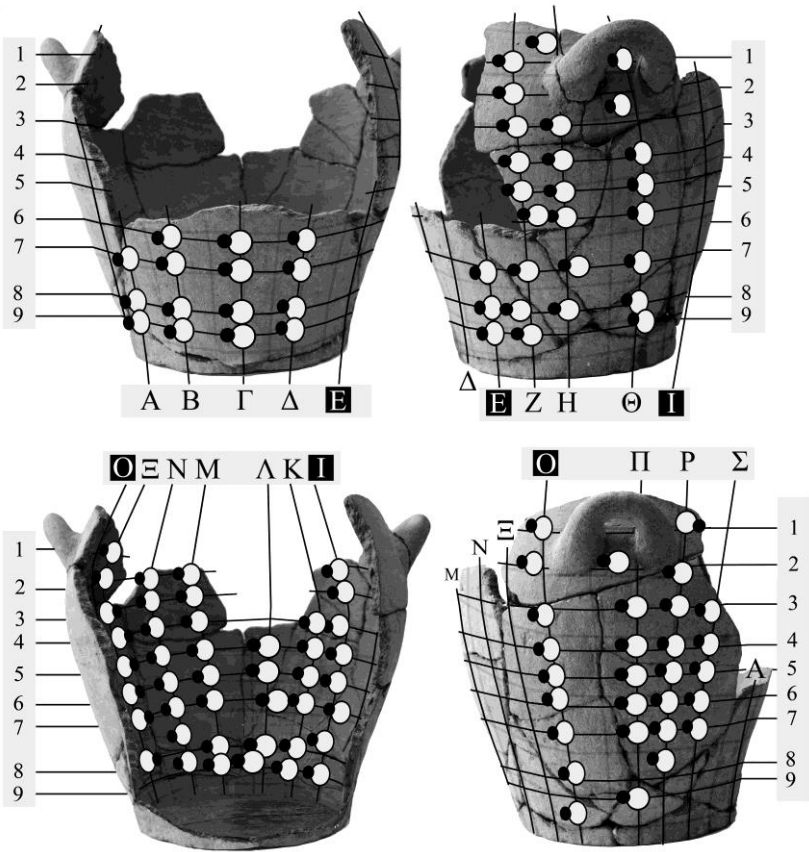

**Table 7b.** Measurements D, L, and sensor readings of  $B_i$  ( $i=x,z,y$ ), with the x-sensor aligned along the common direction of  $B_{xz}$ ,  $M_{xz}$ , on the body fragments of **vase 2**.

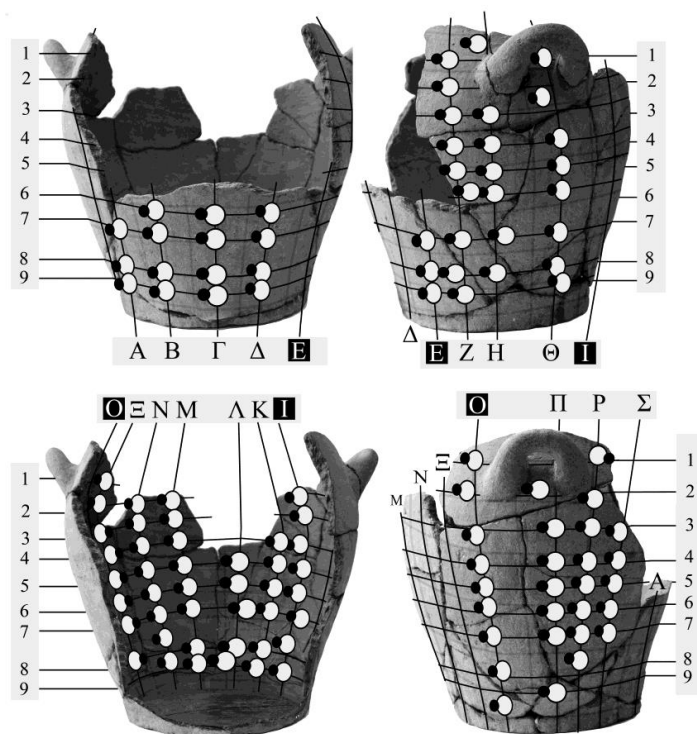

| Vase 2                                                                              |                         |       |       |       |      |      |      |      |      |      |
|-------------------------------------------------------------------------------------|-------------------------|-------|-------|-------|------|------|------|------|------|------|
|  |                         |       |       |       |      |      |      |      |      |      |
|                                                                                     |                         | A     | B     | Г     | Δ    | E    | Z    | H    | Θ    | I    |
| 6                                                                                   | D (±0.3) cm             |       | 23.2  | 7.6   | 6.4  |      | 8.9  | 9.4  | 11.4 | 3.3  |
|                                                                                     | L (±0.1) cm             |       | 1.3   | 1.3   | 1.3  |      | 1.4  | 1.3  | 1.3  | 1.3  |
|                                                                                     | B <sub>xz</sub> (±1) nT |       | 88    | 105   | 102  |      | 93   | 86   | 93   | 104  |
|                                                                                     | B <sub>y</sub> (±1) nT  |       | -26   | -8    | 8    |      | 23   | 26   | 23   | 19   |
|                                                                                     | B (±1) nT               |       | 92    | 105   | 102  |      | 96   | 90   | 96   | 106  |
|                                                                                     | Θ <sub>s</sub> °        |       | -74±1 | -86±1 | 86±1 |      | 76±1 | 73±1 | 76±1 | 80±1 |
| 7                                                                                   | D (±0.3) cm             | 27.8  | 21.2  | 14.6  | 11.0 | 8.1  | 3.9  | 2.7  | 14.6 | 3.0  |
|                                                                                     | L (±0.1) cm             | 1.1   | 1.3   | 1.2   | 1.2  | 1.4  | 1.3  | 1.2  | 1.2  | 1.2  |
|                                                                                     | B <sub>xz</sub> (±1) nT | 47    | 88    | 100   | 107  | 94   | 95   | 89   | 95   | 107  |
|                                                                                     | B <sub>y</sub> (±1) nT  | -33   | -26   | -14   | 5    | 20   | 22   | 24   | 22   | 9    |
|                                                                                     | B (±1) nT               | 57    | 92    | 101   | 107  | 96   | 98   | 92   | 98   | 107  |
|                                                                                     | Θ <sub>s</sub> °        | -55±1 | -74±1 | -82±1 | 87±1 | 78±1 | 77±1 | 75±1 | 77±1 | 85±1 |
| 8                                                                                   | D (±0.3) cm             | 12.9  | 14.1  | 8.7   | 14.8 | 10.0 | 2.9  | 3.2  | 3.3  | 1.8  |
|                                                                                     | L (±0.1) cm             | 1.0   | 1.1   | 1.0   | 1.1  | 1.2  | 1.1  | 1.1  | 1.1  | 1.1  |
|                                                                                     | B <sub>xz</sub> (±1) nT | 55    | 87    | 102   | 104  | 92   | 86   | 77   | 85   | 97   |
|                                                                                     | B <sub>y</sub> (±1) nT  | -36   | -27   | -9    | 9    | 22   | 25   | 30   | 27   | 12   |
|                                                                                     | B (±1) nT               | 66    | 91    | 102   | 104  | 95   | 90   | 83   | 89   | 98   |
|                                                                                     | Θ <sub>s</sub> °        | -57±1 | -73±1 | -85±1 | 85±1 | 77±1 | 74±1 | 69±1 | 72±1 | 83±1 |
| 9                                                                                   | D (±0.3) cm             | 4.9   | 7.6   | 8.7   | 16.6 | 13.0 | 4.1  |      | 4.4  | 2.4  |
|                                                                                     | L (±0.1) cm             | 0.9   | 0.9   | 0.9   | 1.0  | 1.1  | 1.0  |      | 0.9  | 1.0  |
|                                                                                     | B <sub>xz</sub> (±1) nT | 51    | 81    | 108   | 101  | 88   | 77   |      | 77   | 102  |
|                                                                                     | B <sub>y</sub> (±1) nT  | -31   | -24   | -2    | 12   | 25   | 29   |      | 28   | 16   |
|                                                                                     | B (±1) nT               | 60    | 84    | 108   | 102  | 91   | 82   |      | 82   | 103  |
|                                                                                     | Θ <sub>s</sub> °        | -59±1 | -73±1 | -89±1 | 83±1 | 74±1 | 69±1 |      | 70±1 | 81±1 |

| Vase 2                                                                              |                         |      |   |       |       |       |       |       |       |       |
|-------------------------------------------------------------------------------------|-------------------------|------|---|-------|-------|-------|-------|-------|-------|-------|
|  |                         | K    | Λ | M     | N     | Ξ     | O     | Π     | P     | Σ     |
| 1                                                                                   | D (±0.3) cm             |      |   |       |       | 7.2   | 9.4   |       | 4.2   |       |
|                                                                                     | L (±0.1) cm             |      |   |       |       | 1.1   | 1.1   |       | 1.0   |       |
|                                                                                     | B <sub>xz</sub> (±1) nT |      |   |       |       | 101   | 101   |       | 86    |       |
|                                                                                     | B <sub>y</sub> (±1) nT  |      |   |       |       | -15   | -16   |       | -22   |       |
|                                                                                     | B (±1) nT               |      |   |       |       | 102   | 102   |       | 89    |       |
|                                                                                     | θ <sub>s</sub> °        |      |   |       |       | -82±1 | -81±1 |       | -76±1 |       |
| 2                                                                                   | D (±0.3) cm             |      |   | 10.9  | 2.7   | 3.6   | 5.0   | 3.0   | 12.6  |       |
|                                                                                     | L (±0.1) cm             |      |   | 1.1   | 1.2   | 1.2   | 1.2   | 1.1   | 1.0   |       |
|                                                                                     | B <sub>xz</sub> (±1) nT |      |   | 105   | 106   | 95    | 81    | 71    | 73    |       |
|                                                                                     | B <sub>y</sub> (±1) nT  |      |   | -2    | -10   | -21   | -30   | -29   | -32   |       |
|                                                                                     | B (±1) nT               |      |   | 105   | 106   | 97    | 86    | 77    | 80    |       |
|                                                                                     | θ <sub>s</sub> °        |      |   | -89±1 | -85±1 | -78±1 | -70±1 | -68±1 | -66±1 |       |
| 3                                                                                   | D (±0.3) cm             |      |   | 11.6  | 4.7   | 8.6   | 10.7  | 8.4   | 8.4   | 8.5   |
|                                                                                     | L (±0.1) cm             |      |   | 1.2   | 1.3   | 1.3   | 1.3   | 1.2   | 1.1   | 1.1   |
|                                                                                     | B <sub>xz</sub> (±1) nT |      |   | 103   | 104   | 92    | 87    | 67    | 67    | 73    |
|                                                                                     | B <sub>y</sub> (±1) nT  |      |   | -5    | -12   | -23   | -26   | -33   | -30   | -30   |
|                                                                                     | B (±1) nT               |      |   | 103   | 105   | 95    | 91    | 75    | 73    | 79    |
|                                                                                     | θ <sub>s</sub> °        |      |   | -87±1 | -83±1 | -76±1 | -73±1 | -64±1 | -66±1 | -68±1 |
| 4                                                                                   | D (±0.3) cm             | 3.6  |   | 6.7   | 3.3   | 8.6   | 8.4   | 2.0   | 2.6   | 3.2   |
|                                                                                     | L (±0.1) cm             | 1.4  |   | 1.6   | 1.7   | 1.7   | 1.7   | 1.6   | 1.5   | 1.5   |
|                                                                                     | B <sub>xz</sub> (±1) nT | 103  |   | 107   | 97    | 81    | 65    | 45    | 50    | 57    |
|                                                                                     | B <sub>y</sub> (±1) nT  | 17   |   | -11   | -19   | -30   | -33   | -42   | -38   | -40   |
|                                                                                     | B (±1) nT               | 104  |   | 108   | 99    | 86    | 73    | 62    | 63    | 70    |
|                                                                                     | θ <sub>s</sub> °        | 81±1 |   | -84±1 | -79±1 | -70±1 | -63±1 | -47±1 | -53±1 | -55±1 |



**Table 7c.** Measurements D, L, and sensor readings of  $B_i$  ( $i=xz,y$ ), with the x-sensor aligned along the common direction of  $B_{xz}$ ,  $M_{xz}$ , on the body fragments of **vase 2**.

|   |                     |            |             |             |             |             |             |             |             |             |
|---|---------------------|------------|-------------|-------------|-------------|-------------|-------------|-------------|-------------|-------------|
| 5 | D ( $\pm 0.3$ ) cm  | 3.0        | 4.0         | 9.9         | 3.9         | 5.4         | 7.9         | 14.8        | 11.7        | 7.6         |
|   | L ( $\pm 0.1$ ) cm  | 1.2        | 1.3         | 1.4         | 1.5         | 1.4         | 1.5         | 1.4         | 1.4         | 1.3         |
|   | $B_{xz} (\pm 1)$ nT | 107        | 109         | 99          | 90          | 79          | 52          | 35          | 31          | 48          |
|   | $B_y (\pm 1)$ nT    | 6          | -3          | -16         | -27         | -32         | -40         | -41         | -41         | -38         |
|   | $B (\pm 1)$ nT      | 107        | 109         | 100         | 94          | 85          | 66          | 54          | 51          | 61          |
|   | $\theta_s^\circ$    | 87 $\pm 1$ | -88 $\pm 1$ | -81 $\pm 1$ | -73 $\pm 1$ | -68 $\pm 1$ | -52 $\pm 1$ | -40 $\pm 1$ | -37 $\pm 1$ | -52 $\pm 1$ |

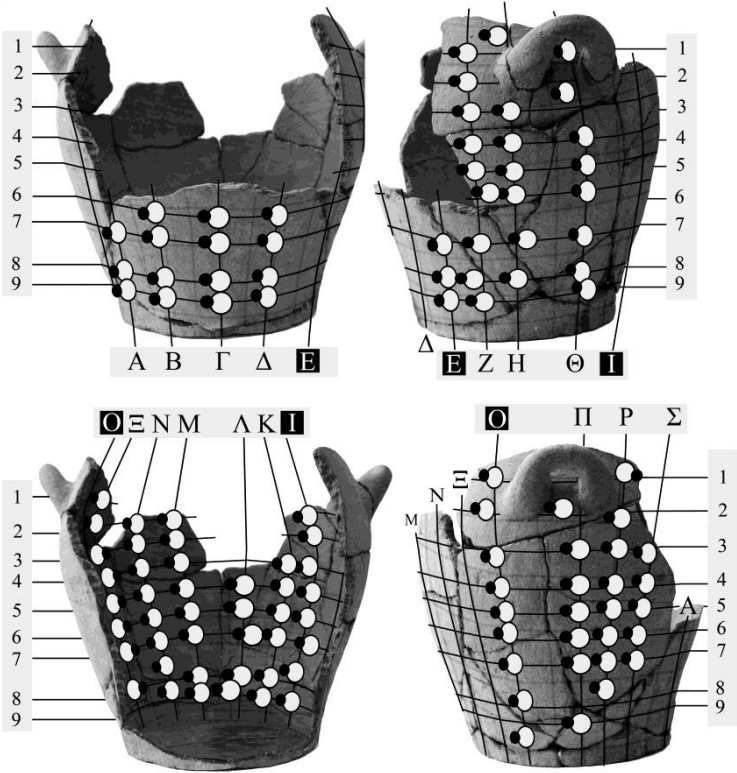

**Table 7d.** Measurements D, L, and sensor readings of  $B_i$  ( $i=xz,y$ ), with the x-sensor aligned along the common direction of  $B_{xz}$ ,  $M_{xz}$ , on the body fragments of **vase 2**.

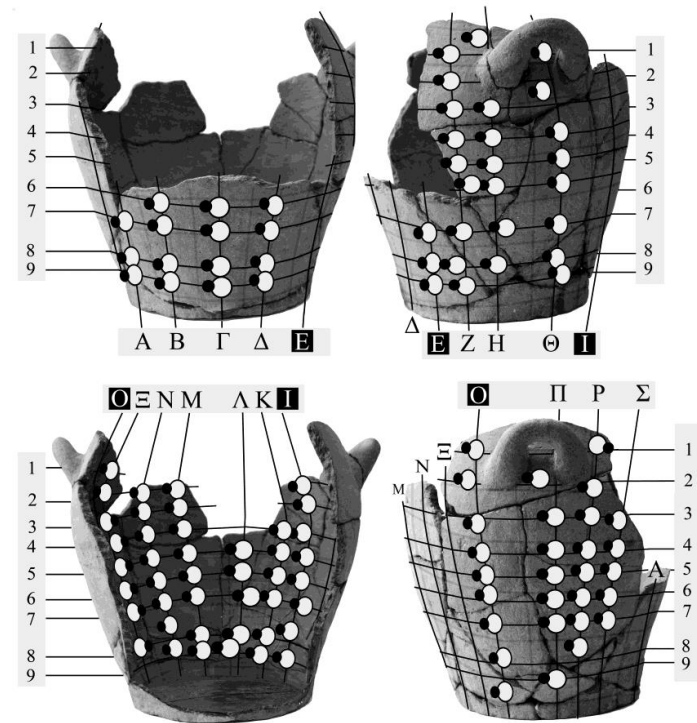

| Vase 2 |                     |            |             |             |             |             |             |             |             |             |
|--------|---------------------|------------|-------------|-------------|-------------|-------------|-------------|-------------|-------------|-------------|
|        |                     | K          | Λ           | M           | N           | Ξ           | O           | Π           | P           | Σ           |
| 6      | D ( $\pm 0.3$ ) cm  | 7.5        | 3.9         | 8.8         | 3.7         | 6.7         | 5.7         | 9.8         | 7.8         | 4.8         |
|        | L ( $\pm 0.1$ ) cm  | 1.2        | 1.2         | 1.3         | 1.4         | 1.5         | 1.4         | 1.3         | 1.3         | 1.3         |
|        | $B_{xz} (\pm 1)$ nT | 104        | 103         | 99          | 86          | 68          | 49          | 27          | 26          | 36          |
|        | $B_y (\pm 1)$ nT    | 6          | -7          | -16         | -25         | -36         | -37         | -40         | -40         | -41         |
|        | B ( $\pm 1$ ) nT    | 104        | 103         | 100         | 90          | 77          | 61          | 48          | 48          | 55          |
|        | $\theta_s^\circ$    | 87 $\pm 1$ | -86 $\pm 1$ | -81 $\pm 1$ | -74 $\pm 1$ | -62 $\pm 1$ | -53 $\pm 1$ | -34 $\pm 1$ | -33 $\pm 1$ | -41 $\pm 1$ |
| 7      | D ( $\pm 0.3$ ) cm  | 7.7        | 10.5        | 8.3         | 3.8         | 8.3         | 4.2         | 5.4         | 5.0         | 2.0         |
|        | L ( $\pm 0.1$ ) cm  | 1.2        | 1.2         | 1.2         | 1.2         | 1.3         | 1.3         | 1.3         | 1.2         | 1.2         |
|        | $B_{xz} (\pm 1)$ nT | 108        | 108         | 96          | 83          | 57          | 41          | 17          | 31          | 31          |
|        | $B_y (\pm 1)$ nT    | 4          | 1           | -20         | -28         | -37         | -38         | -43         | -39         | -39         |
|        | B ( $\pm 1$ ) nT    | 108        | 108         | 98          | 88          | 68          | 56          | 46          | 50          | 50          |
|        | $\theta_s^\circ$    | 88 $\pm 1$ | 89 $\pm 1$  | -78 $\pm 1$ | -71 $\pm 1$ | -57 $\pm 1$ | -47 $\pm 1$ | -22 $\pm 1$ | -38 $\pm 1$ | -38 $\pm 1$ |
| 8      | D ( $\pm 0.3$ ) cm  | 2.3        | 1.8         | 6.6         | 2.7         | 3.8         | 2.0         |             | 2.0         |             |
|        | L ( $\pm 0.1$ ) cm  | 1.1        | 1.1         | 1.1         | 1.1         | 1.2         | 1.2         |             | 1.1         |             |
|        | $B_{xz} (\pm 1)$ nT | 108        | 104         | 104         | 88          | 63          | 46          |             | 26          |             |
|        | $B_y (\pm 1)$ nT    | 4          | -5          | -13         | -24         | -34         | -37         |             | -37         |             |
|        | B ( $\pm 1$ ) nT    | 108        | 104         | 105         | 91          | 72          | 59          |             | 45          |             |
|        | $\theta_s^\circ$    | 88 $\pm 1$ | -87 $\pm 1$ | -83 $\pm 1$ | -75 $\pm 1$ | -62 $\pm 1$ | -51 $\pm 1$ |             | -35 $\pm 1$ |             |
| 9      | D ( $\pm 0.3$ ) cm  | 2.1        | 1.8         | 2.7         | 2.5         |             | 2.1         | 2.7         |             |             |
|        | L ( $\pm 0.1$ ) cm  | 0.9        | 1.1         | 0.9         | 1.0         |             | 1.1         | 1.0         |             |             |
|        | $B_{xz} (\pm 1)$ nT | 103        | 108         | 105         | 91          |             | 48          | 32          |             |             |
|        | $B_y (\pm 1)$ nT    | 8          | -6          | -12         | -23         |             | -35         | -36         |             |             |
|        | B ( $\pm 1$ ) nT    | 103        | 108         | 106         | 94          |             | 59          | 48          |             |             |
|        | $\theta_s^\circ$    | 86 $\pm 1$ | -87 $\pm 1$ | -83 $\pm 1$ | -76 $\pm 1$ |             | -54 $\pm 1$ | -42 $\pm 1$ |             |             |

| Vase 2                                                                             |                       |   |   |          |          |   |       |       |          |      |
|------------------------------------------------------------------------------------|-----------------------|---|---|----------|----------|---|-------|-------|----------|------|
|  |                       | A | B | $\Gamma$ | $\Delta$ | E | Z     | H     | $\Theta$ | I    |
| 1                                                                                  | $B_y(\pm 1\text{nT})$ |   |   |          |          |   | 35    | 29    | 34       |      |
|                                                                                    | $B_x(\pm 1\text{nT})$ |   |   |          |          |   | -13   | -2    | 19       |      |
|                                                                                    | $B_z(\pm 1\text{nT})$ |   |   |          |          |   | 19    | 11    | 17       |      |
|                                                                                    | $B(\pm 1\text{nT})$   |   |   |          |          |   | 42    | 31    | 42       |      |
|                                                                                    | $\theta_B^\circ$      |   |   |          |          |   | 33±1  | 21±2  | 37±1     |      |
|                                                                                    | $\phi_B^\circ$        |   |   |          |          |   | 124±2 | 100±5 | 42±2     |      |
| 2                                                                                  | $B_y(\pm 1\text{nT})$ |   |   |          |          |   | 38    |       |          | 32   |
|                                                                                    | $B_x(\pm 1\text{nT})$ |   |   |          |          |   | -15   |       |          | 51   |
|                                                                                    | $B_z(\pm 1\text{nT})$ |   |   |          |          |   | 32    |       |          | 43   |
|                                                                                    | $B(\pm 1\text{nT})$   |   |   |          |          |   | 52    |       |          | 74   |
|                                                                                    | $\theta_B^\circ$      |   |   |          |          |   | 43±1  |       |          | 64±1 |
|                                                                                    | $\phi_B^\circ$        |   |   |          |          |   | 115±2 |       |          | 40±1 |
| 3                                                                                  | $B_y(\pm 1\text{nT})$ |   |   |          |          |   | 38    | 41    | 37       | 25   |
|                                                                                    | $B_x(\pm 1\text{nT})$ |   |   |          |          |   | -24   | -5    | 25       | 65   |
|                                                                                    | $B_z(\pm 1\text{nT})$ |   |   |          |          |   | 44    | 41    | 44       | 59   |
|                                                                                    | $B(\pm 1\text{nT})$   |   |   |          |          |   | 63    | 58    | 63       | 91   |
|                                                                                    | $\theta_B^\circ$      |   |   |          |          |   | 53±1  | 45±1  | 54±1     | 74±1 |
|                                                                                    | $\phi_B^\circ$        |   |   |          |          |   | 119±1 | 97±1  | 60±1     | 42±1 |
| 4                                                                                  | $B_y(\pm 1\text{nT})$ |   |   |          |          |   | 37    | 33    | 29       | 20   |
|                                                                                    | $B_x(\pm 1\text{nT})$ |   |   |          |          |   | -27   | -17   | 36       | 61   |
|                                                                                    | $B_z(\pm 1\text{nT})$ |   |   |          |          |   | 71    | 72    | 70       | 73   |
|                                                                                    | $B(\pm 1\text{nT})$   |   |   |          |          |   | 84    | 81    | 84       | 97   |
|                                                                                    | $\theta_B^\circ$      |   |   |          |          |   | 64±1  | 66±1  | 70±1     | 78±1 |
|                                                                                    | $\phi_B^\circ$        |   |   |          |          |   | 1     |       | 1        |      |
|                                                                                    | $B_y(\pm 1\text{nT})$ |   |   |          |          |   | 34    | 33    | 25       | 16   |

**Table 8a.** Indicative sensor readings with the x-sensor oriented in the grooves' direction on the body fragments of **vase 2**.

|   |                  |  |  |  |  |  |       |      |      |      |
|---|------------------|--|--|--|--|--|-------|------|------|------|
| 5 | $B_x(\pm 1nT)$   |  |  |  |  |  | -32   | -12  | 35   | 59   |
|   | $B_z(\pm 1nT)$   |  |  |  |  |  | 81    | 77   | 82   | 75   |
|   | $B(\pm 1nT)$     |  |  |  |  |  | 93    | 85   | 93   | 97   |
|   | $\theta_B^\circ$ |  |  |  |  |  | 69±1  | 67±1 | 74±1 | 80±1 |
|   | $\phi_B^\circ$   |  |  |  |  |  | 112±1 | 99±1 | 67±1 | 52±1 |

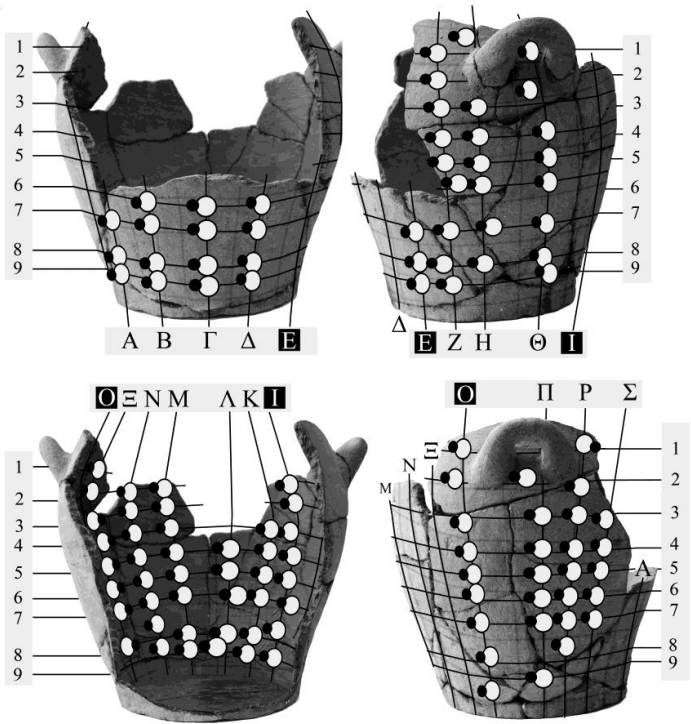

**Table 8b.** Indicative sensor readings with the x-sensor oriented in the grooves' direction on the body fragments of **vase 2**.

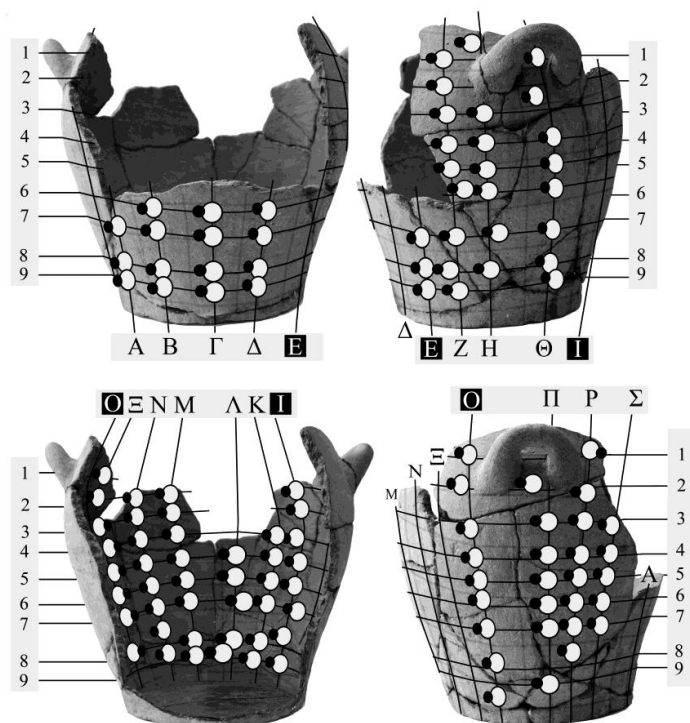

| Vase 2                                                                              |                       |       |       |       |       |       |       |       |      |      |
|-------------------------------------------------------------------------------------|-----------------------|-------|-------|-------|-------|-------|-------|-------|------|------|
|  |                       |       |       |       |       |       |       |       |      |      |
|                                                                                     |                       | A     | B     | Г     | Δ     | E     | Z     | H     | Θ    | I    |
| 6                                                                                   | B <sub>γ</sub> (±1nT) |       | -29   | -8    | 8     |       | 23    | 27    | 23   | 18   |
|                                                                                     | B <sub>χ</sub> (±1nT) |       | -75   | -83   | -75   |       | -38   | -5    | 31   | 56   |
|                                                                                     | B <sub>z</sub> (±1nT) |       | 53    | 66    | 78    |       | 87    | 78    | 84   | 81   |
|                                                                                     | B(±1nT)               |       | 96    | 106   | 109   |       | 98    | 83    | 92   | 100  |
|                                                                                     | Θ <sub>B</sub> °      |       | -72±1 | -86±1 | 86±1  |       | 76±1  | 71±1  | 76±1 | 80±1 |
|                                                                                     | Φ <sub>B</sub> °      |       | 145±1 | 142±1 | 134±1 |       | 114±1 | 94±1  | 70±1 | 55±1 |
| 7                                                                                   | B <sub>γ</sub> (±1nT) | -33   | -25   | -15   | 5     | 20    | 22    | 25    | 22   | 10   |
|                                                                                     | B <sub>χ</sub> (±1nT) | -37   | -76   | -82   | -70   | -42   | -22   | -10   | 26   | 67   |
|                                                                                     | B <sub>z</sub> (±1nT) | 24    | 53    | 61    | 73    | 87    | 91    | 83    | 89   | 80   |
|                                                                                     | B(±1nT)               | 55    | 96    | 103   | 101   | 99    | 96    | 87    | 95   | 105  |
|                                                                                     | Θ <sub>B</sub> °      | -53±1 | -75±1 | -82±1 | 87±1  | 78±1  | 77±1  | 73±1  | 77±1 | 85±1 |
|                                                                                     | Φ <sub>B</sub> °      | 147±1 | 145±1 | 143±1 | 134±1 | 116±1 | 104±1 | 97±1  | 74±1 | 50±1 |
| 8                                                                                   | B <sub>γ</sub> (±1nT) | -35   | -27   | -9    | 7     | 22    | 25    | 29    | 26   | 11   |
|                                                                                     | B <sub>χ</sub> (±1nT) | -42   | -66   | -81   | -67   | -44   | -33   | -16   | 23   | 64   |
|                                                                                     | B <sub>z</sub> (±1nT) | 31    | 45    | 64    | 77    | 83    | 86    | 84    | 89   | 72   |
|                                                                                     | B(±1nT)               | 63    | 84    | 104   | 102   | 96    | 95    | 90    | 96   | 97   |
|                                                                                     | Θ <sub>B</sub> °      | -56±1 | -71±1 | -85±1 | 86±1  | 77±1  | 75±1  | 71±1  | 74±1 | 83±1 |
|                                                                                     | Φ <sub>B</sub> °      | 144±1 | 146±1 | 142±1 | 131±1 | 118±1 | 111±1 | 101±1 | 76±1 | 48±1 |
| 9                                                                                   | B <sub>γ</sub> (±1nT) | -30   | -24   | -1    | 13    | 26    | 28    |       | 28   | 16   |
|                                                                                     | B <sub>χ</sub> (±1nT) | -35   | -70   | -80   | -78   | -50   | -27   |       | 29   | 65   |
|                                                                                     | B <sub>z</sub> (±1nT) | 32    | 54    | 67    | 78    | 76    | 68    |       | 77   | 75   |
|                                                                                     | B(±1nT)               | 56    | 92    | 104   | 111   | 95    | 78    |       | 87   | 101  |
|                                                                                     | Θ <sub>B</sub> °      | -58±1 | -75±1 | -89±1 | 83±1  | 74±1  | 69±1  |       | 71±1 | 81±1 |
|                                                                                     | Φ <sub>B</sub> °      | 138±1 | 142±1 | 1401  | 135±1 | 123±1 | 112±1 |       | 69±1 | 49±1 |

| Vase 2                                                                             |                       |      |       |       |       |       |       |       |       |       |
|------------------------------------------------------------------------------------|-----------------------|------|-------|-------|-------|-------|-------|-------|-------|-------|
|  |                       | K    | Λ     | M     | N     | Ξ     | O     | Π     | P     | Σ     |
| 1                                                                                  | $B_y(\pm 1\text{nT})$ |      |       |       |       | -14   | -17   |       | -23   |       |
|                                                                                    | $B_x(\pm 1\text{nT})$ |      |       |       |       | 59    | 45    |       | -13   |       |
|                                                                                    | $B_z(\pm 1\text{nT})$ |      |       |       |       | 83    | 90    |       | 89    |       |
|                                                                                    | $B(\pm 1\text{nT})$   |      |       |       |       | 103   | 102   |       | 93    |       |
|                                                                                    | $\theta_B^\circ$      |      |       |       |       | -82±1 | -80±1 |       | -76±1 |       |
|                                                                                    | $\phi_B^\circ$        |      |       |       |       | 55±1  | 63±1  |       | 98±1  |       |
| 2                                                                                  | $B_y(\pm 1\text{nT})$ |      |       | -1    | -10   | -20   | -29   | -30   | -31   |       |
|                                                                                    | $B_x(\pm 1\text{nT})$ |      |       | 82    | 70    | 63    | 42    | 8     | -19   |       |
|                                                                                    | $B_z(\pm 1\text{nT})$ |      |       | 70    | 71    | 76    | 74    | 73    | 66    |       |
|                                                                                    | $B(\pm 1\text{nT})$   |      |       | 108   | 100   | 101   | 90    | 79    | 75    |       |
|                                                                                    | $\theta_B^\circ$      |      |       | -89±1 | -84±1 | -79±1 | -71±1 | -68±1 | -66±1 |       |
|                                                                                    | $\phi_B^\circ$        |      |       | 40±1  | 45±1  | 50±1  | 60±1  | 84±1  | 106±1 |       |
| 3                                                                                  | $B_y(\pm 1\text{nT})$ |      |       | -6    | -12   | -22   | -26   | -33   | -30   | -30   |
|                                                                                    | $B_x(\pm 1\text{nT})$ |      |       | 78    | 77    | 60    | 46    | 4     | -23   | -33   |
|                                                                                    | $B_z(\pm 1\text{nT})$ |      |       | 69    | 73    | 67    | 66    | 67    | 68    | 61    |
|                                                                                    | $B(\pm 1\text{nT})$   |      |       | 104   | 107   | 93    | 85    | 75    | 78    | 76    |
|                                                                                    | $\theta_B^\circ$      |      |       | -87±1 | -84±1 | -76±1 | -72±1 | -64±1 | -67±1 | -67±1 |
|                                                                                    | $\phi_B^\circ$        |      |       | 41±1  | 43±1  | 48±1  | 55±1  | 87±1  | 109±1 | 118±1 |
| 4                                                                                  | $B_y(\pm 1\text{nT})$ | 17   |       | -10   | -18   | -30   | -34   | -41   | -38   | -39   |
|                                                                                    | $B_x(\pm 1\text{nT})$ | 68   |       | 81    | 76    | 65    | 44    | 1     | -23   | -28   |
|                                                                                    | $B_z(\pm 1\text{nT})$ | 66   |       | 66    | 63    | 56    | 53    | 46    | 50    | 44    |
|                                                                                    | $B(\pm 1\text{nT})$   | 96   |       | 105   | 100   | 91    | 77    | 62    | 67    | 65    |
|                                                                                    | $\theta_B^\circ$      | 80±1 |       | -85±1 | -80±1 | -71±1 | -64±1 | -48±1 | -55±1 | -53±1 |
|                                                                                    | $\phi_B^\circ$        | 44±1 |       | 39±1  | 40±1  | 41±1  | 50±1  | 89±1  | 115±1 | 122±1 |
| 5                                                                                  | $B_y(\pm 1\text{nT})$ | 6    | -2    | -14   | -26   | -32   | -39   | -42   | -41   | -38   |
|                                                                                    | $B_x(\pm 1\text{nT})$ | 74   | 77    | 80    | 70    | 59    | 38    | -2    | -14   | -30   |
|                                                                                    | $B_z(\pm 1\text{nT})$ | 70   | 65    | 59    | 54    | 47    | 36    | 35    | 29    | 31    |
|                                                                                    | $B(\pm 1\text{nT})$   | 102  | 101   | 100   | 92    | 82    | 65    | 55    | 52    | 57    |
|                                                                                    | $\theta_B^\circ$      | 87±1 | -89±1 | -82±1 | -74±1 | -67±1 | -53±1 | -40±1 | -38±1 | -49±1 |

|                |      |      |      |      |      |      |      |       |       |
|----------------|------|------|------|------|------|------|------|-------|-------|
| $\phi_B^\circ$ | 43±1 | 40±1 | 36±1 | 38±1 | 39±1 | 43±1 | 93±2 | 116±2 | 134±1 |
|----------------|------|------|------|------|------|------|------|-------|-------|

**Table 8c.** Indicative sensor readings with the x-sensor oriented in the grooves’ direction on the body fragments of **vase 2**.

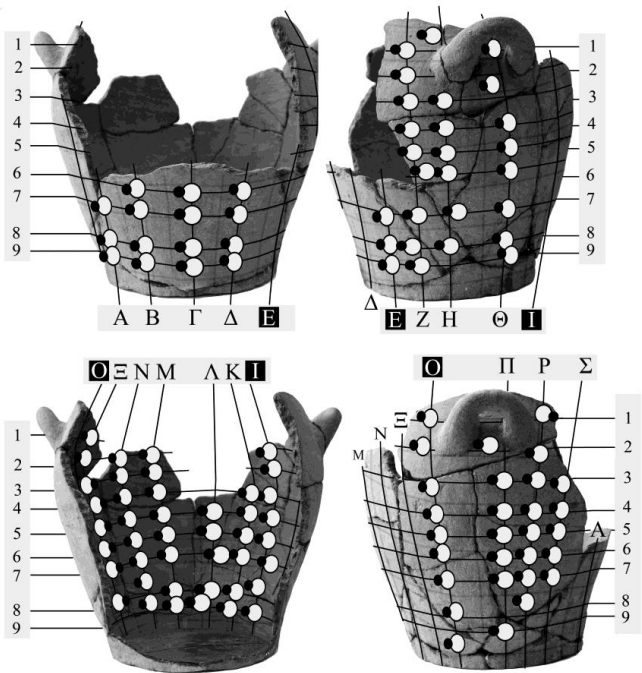

**Table 8d.** Indicative sensor readings with the x-sensor oriented in the grooves' direction on the body fragments of **vase 2**.

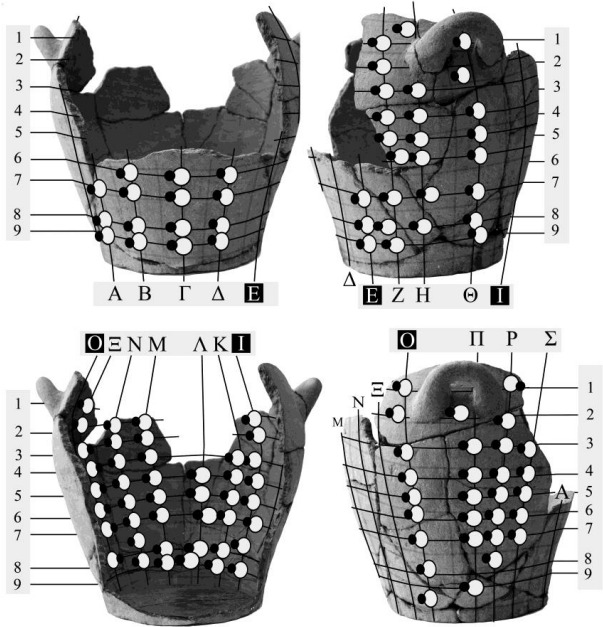

| Vase 2 |                  |      |       |       |       |       |       |       |       |       |
|--------|------------------|------|-------|-------|-------|-------|-------|-------|-------|-------|
|        |                  | K    | Λ     | M     | N     | Ξ     | O     | Π     | P     | Σ     |
| 6      | $B_y (\pm 1nT)$  | 6    | -6    | -17   | -25   | -34   | -38   | -40   | -40   | -41   |
|        | $B_x (\pm 1nT)$  | 73   | 80    | 81    | 71    | 55    | 41    | -5    | -13   | -25   |
|        | $B_z (\pm 1nT)$  | 76   | 68    | 57    | 49    | 42    | 34    | 23    | 23    | 30    |
|        | $B (\pm 1nT)$    | 106  | 105   | 100   | 90    | 77    | 65    | 465   | 48    | 57    |
|        | $\theta_s^\circ$ | 87±1 | -87±1 | -80±1 | -74±1 | -64±1 | -54±1 | -30±1 | -33±1 | -44±1 |
|        | $\phi_s^\circ$   | 46±1 | 40±1  | 35±1  | 35±1  | 37±1  | 40±1  | 102±2 | 119±2 | 130±1 |
| 7      | $B_y (\pm 1nT)$  | 5    | 1     | -20   | -27   | -36   | -39   | -43   | -39   | -39   |
|        | $B_x (\pm 1nT)$  | 75   | 80    | 78    | 74    | 48    | 35    | -1    | -12   | -26   |
|        | $B_z (\pm 1nT)$  | 74   | 74    | 50    | 48    | 33    | 29    | 19    | 23    | 23    |
|        | $B (\pm 1nT)$    | 105  | 109   | 95    | 92    | 68    | 60    | 47    | 47    | 52    |
|        | $\theta_s^\circ$ | 87±1 | 89±1  | -78±1 | -73±1 | -58±1 | -49±1 | -24±1 | -34±1 | -42±1 |
|        | $\phi_s^\circ$   | 45±1 | 43±1  | 33±1  | 33±1  | 35±1  | 40±1  | 93±3  | 118±2 | 139±2 |
| 8      | $B_y (\pm 1nT)$  | 5    | -4    | -15   | -25   | -35   | -37   |       | -38   |       |
|        | $B_x (\pm 1nT)$  | 79   | 77    | 80    | 68    | 51    | 29    |       | -11   |       |
|        | $B_z (\pm 1nT)$  | 73   | 63    | 58    | 48    | 35    | 31    |       | 28    |       |
|        | $B (\pm 1nT)$    | 103  | 100   | 100   | 87    | 71    | 56    |       | 48    |       |
|        | $\theta_s^\circ$ | 87±1 | -88±1 | -81±1 | -73±1 | -60±1 | -49±1 |       | -38±1 |       |
|        | $\phi_s^\circ$   | 45±1 | 39±1  | 36±1  | 35±1  | 34±1  | 47±1  |       | 111±2 |       |
| 9      | $B_y (\pm 1nT)$  | 7    | -4    | -13   | -24   |       | -36   | -37   |       |       |
|        | $B_x (\pm 1nT)$  | 72   | 81    | 82    | 68    |       | 33    | 3     |       |       |
|        | $B_z (\pm 1nT)$  | 67   | 67    | 63    | 55    |       | 36    | 32    |       |       |
|        | $B (\pm 1nT)$    | 99   | 105   | 104   | 91    |       | 61    | 49    |       |       |
|        | $\theta_s^\circ$ | 86±1 | -88±1 | -83±1 | -75±1 |       | -54±1 | -41±1 |       |       |
|        | $\phi_s^\circ$   | 43±1 | 40±1  | 38±1  | 39±1  |       | 47±1  | 85±2  |       |       |



| Vase 3                                                                             |                     |                          |                                    |                  |             |             |             |             |             |             |            |
|------------------------------------------------------------------------------------|---------------------|--------------------------|------------------------------------|------------------|-------------|-------------|-------------|-------------|-------------|-------------|------------|
|  |                     | $\alpha_y^\perp$<br>(cm) | $\alpha_{x,z}^{\parallel}$<br>(cm) | $\lambda$        |             |             |             |             |             |             |            |
|                                                                                    |                     | 1,07<br>$\pm 0,05$       | 1,61<br>$\pm 0,03$                 | 2,0<br>$\pm 0,1$ |             |             |             |             |             |             |            |
|                                                                                    |                     | A                        | B                                  | $\Gamma$         | $\Delta$    | E           | Z           | H           | $\Theta$    | I           | K          |
| 1                                                                                  | D ( $\pm 0.3$ ) cm  | 5.3                      | 4.4                                |                  | 2.9         | 4.8         | 4.6         | 7.6         | 4.3         |             | 2.6        |
|                                                                                    | L ( $\pm 0.1$ ) cm  | 1.1                      | 0.9                                |                  | 0.8         | 1.0         | 1.1         | 0.9         | 9.0         |             | 1.2        |
|                                                                                    | $B_{xz} (\pm 1)$ nT | 29                       | 53                                 |                  | 105         | 96          | 90          | 92          | 105         |             | 59         |
|                                                                                    | $B_y (\pm 1)$ nT    | 34                       | 34                                 |                  | -5          | -16         | -17         | -19         | 4           |             | 40         |
|                                                                                    | B ( $\pm 1$ ) nT    | 45                       | 63                                 |                  | 105         | 97          | 92          | 94          | 105         |             | 71         |
|                                                                                    | $\theta_B^\circ$    | 40 $\pm 1$               | 57 $\pm 1$                         |                  | -87 $\pm 1$ | -81 $\pm 1$ | -79 $\pm 1$ | -78 $\pm 1$ | 88 $\pm 1$  |             | 56 $\pm 1$ |
| 2                                                                                  | D ( $\pm 0.3$ ) cm  | 7.8                      | 9.7                                |                  | 5.4         |             |             | 4.5         |             | 1.9         | 3.7        |
|                                                                                    | L ( $\pm 0.1$ ) cm  | 1.4                      | 1.3                                |                  | 1.5         |             |             | 1.5         |             | 1.4         | 1.5        |
|                                                                                    | $B_{xz} (\pm 1)$ nT | 50                       | 79                                 |                  | 99          |             |             | 97          |             | 94          | 60         |
|                                                                                    | $B_y (\pm 1)$ nT    | 36                       | 28                                 |                  | -14         |             |             | -22         |             | 14          | 38         |
|                                                                                    | B ( $\pm 1$ ) nT    | 62                       | 84                                 |                  | 100         |             |             | 99          |             | 95          | 71         |
|                                                                                    | $\theta_B^\circ$    | 54 $\pm 1$               | 70 $\pm 1$                         |                  | -82 $\pm 1$ |             |             | -77 $\pm 1$ |             | 82 $\pm 1$  | 58 $\pm 1$ |
| 3                                                                                  | D ( $\pm 0.3$ ) cm  | 8.6                      |                                    | 4.1              | 3.1         | 5.1         | 3.0         | 12.3        | 4.1         | 4.6         | 8.9        |
|                                                                                    | L ( $\pm 0.1$ ) cm  | 1.4                      |                                    | 1.2              | 1.4         | 1.3         | 1.3         | 1.4         | 1.5         | 1.4         | 1.3        |
|                                                                                    | $B_{xz} (\pm 1)$ nT | 94                       |                                    | 102              | 76          | 44          | 38          | 73          | 95          | 106         | 96         |
|                                                                                    | $B_y (\pm 1)$ nT    | 20                       |                                    | -13              | -30         | -40         | -42         | -31         | -13         | 2           | 14         |
|                                                                                    | B ( $\pm 1$ ) nT    | 96 $\pm 1$               |                                    | 103 $\pm 1$      | 82 $\pm 1$  | 59 $\pm 1$  | 57 $\pm 1$  | 79 $\pm 1$  | 95 $\pm 1$  | 106 $\pm 1$ | 97 $\pm 1$ |
|                                                                                    | $\theta_B^\circ$    | 78                       |                                    | -83              | -68         | -48         | -42         | -67         | -82         | 89          | 82         |
| 4                                                                                  | D ( $\pm 0.3$ ) cm  | 4.1                      | 5.6                                | 5.0              | 2.4         | 2.0         | 3.8         | 8.7         | 2.7         | 8.3         | 15.7       |
|                                                                                    | L ( $\pm 0.1$ ) cm  | 1.4                      | 1.3                                | 1.3              | 1.5         | 1.3         | 1.3         | 1.3         | 1.4         | 1.4         | 1.3        |
|                                                                                    | $B_{xz} (\pm 1)$ nT | 102                      | 104                                | 87               | 55          | 52          | 27          | 52          | 89          | 99          | 102        |
|                                                                                    | $B_y (\pm 1)$ nT    | 16                       | 7                                  | -20              | -34         | -35         | -44         | -33         | -23         | -1          | 12         |
|                                                                                    | B ( $\pm 1$ ) nT    | 103                      | 104                                | 89               | 65          | 63          | 52          | 62          | 92          | 99          | 103        |
|                                                                                    | $\theta_B^\circ$    | 81 $\pm 1$               | 86 $\pm 1$                         | -77 $\pm 1$      | -58 $\pm 1$ | -56 $\pm 1$ | -32 $\pm 1$ | -58 $\pm 1$ | -76 $\pm 1$ | -89 $\pm 1$ | 83 $\pm 1$ |
|                                                                                    | D ( $\pm 0.3$ ) cm  | 9.8                      | 10.7                               | 4.5              | 7.4         | 8.4         | 2.3         | 3.2         | 6.8         | 4.9         | 18.8       |
|                                                                                    | L ( $\pm 0.1$ ) cm  | 1.3                      | 1.2                                | 1.1              | 1.2         | 1.2         | 1.1         | 1.1         | 1.2         | 1.2         | 1.3        |
|                                                                                    | $B_{xz} (\pm 1)$ nT | 88                       | 95                                 | 96               | 71          | 59          | 39          | 64          | 101         | 104         | 95         |

|   |                          |      |      |       |       |       |       |       |       |      |      |
|---|--------------------------|------|------|-------|-------|-------|-------|-------|-------|------|------|
| 5 | $B_y (\pm 1) \text{ nT}$ | 19   | 18   | -13   | -30   | -38   | -35   | -32   | -12   | 6    | 18   |
|   | $B (\pm 1) \text{ nT}$   | 90   | 97   | 97    | 77    | 70    | 52    | 72    | 102   | 104  | 97   |
|   | $\theta_8^\circ$         | 78±1 | 79±1 | -82±1 | -67±1 | -57±1 | -48±1 | -63±1 | -83±1 | 87±1 | 79±1 |

**Table 9.** Measurements D, L, and sensor readings of  $B_i$  ( $i=x,z,y$ ), with the x-sensor aligned along the common direction of  $B_{xz}$ ,  $M_{xz}$ , on the body fragments of **vase 3**.

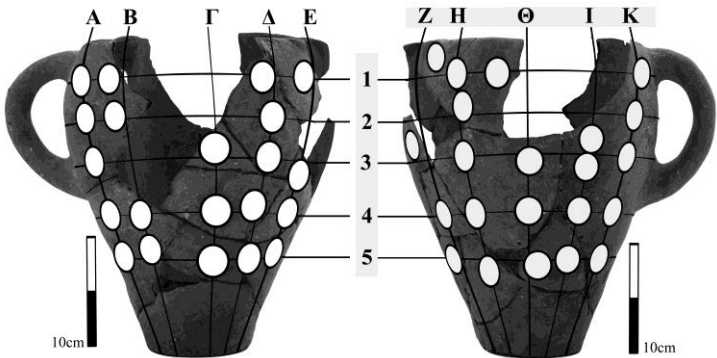

| Vase 3 |                  |       |       |       |       |       |       |       |       |       |      |
|--------|------------------|-------|-------|-------|-------|-------|-------|-------|-------|-------|------|
|        |                  | A     | B     | Г     | Δ     | E     | Z     | H     | Θ     | I     | K    |
| 1      | $B_y (\pm 1nT)$  | 36    | 34    |       | -6    | -16   | -17   | -19   | 4     |       | 40   |
|        | $B_x (\pm 1nT)$  | -22   | -38   |       | -60   | -34   | 31    | 51    | 75    |       | 51   |
|        | $B_z (\pm 1nT)$  | 26    | 40    |       | 82    | 87    | 91    | 86    | 78    |       | 39   |
|        | $B (\pm 1nT)$    | 50    | 65    |       | 102   | 95    | 98    | 102   | 108   |       | 76   |
|        | $\theta_B^\circ$ | 43±1  | 58±1  |       | -87±1 | -80±1 | -80±1 | -79±1 | 88±1  |       | 58±1 |
|        | $\phi_B^\circ$   | 130±2 | 134±1 |       | 126±1 | 111±1 | 71±1  | 59±1  | 46±1  |       | 37±1 |
| 2      | $B_y (\pm 1nT)$  | 36    | 28    |       | -15   |       |       | -22   |       | 15    | 37   |
|        | $B_x (\pm 1nT)$  | -24   | -51   |       | -57   |       |       | 55    |       | 73    | 37   |
|        | $B_z (\pm 1nT)$  | 49    | 51    |       | 71    |       |       | 84    |       | 67    | 46   |
|        | $B (\pm 1nT)$    | 65    | 77    |       | 92    |       |       | 103   |       | 100   | 70   |
|        | $\theta_B^\circ$ | 57±1  | 69±1  |       | -81±1 |       |       | -78±1 |       | 81±1  | 58±1 |
|        | $\phi_B^\circ$   | 116±1 | 135±1 |       | 129±1 |       |       | 57±1  |       | 43±1  | 51±1 |
| 3      | $B_y (\pm 1nT)$  | 19    |       | -14   | -31   | -39   | -41   | -32   | -14   | 2     | 14   |
|        | $B_x (\pm 1nT)$  | -36   |       | -70   | -58   | -31   | 18    | 48    | 74    | 65    | 46   |
|        | $B_z (\pm 1nT)$  | 84    |       | 64    | 43    | 30    | 33    | 49    | 65    | 74    | 94   |
|        | $B (\pm 1nT)$    | 93    |       | 96    | 79    | 58    | 56    | 76    | 99    | 99    | 106  |
|        | $\theta_B^\circ$ | 78±1  |       | -82±1 | -67±1 | -48±1 | -43±1 | -65±1 | -82±1 | 89±1  | 82±1 |
|        | $\phi_B^\circ$   | 113±1 |       | 138±1 | 143±1 | 136±1 | 61±2  | 46±1  | 41±1  | 49±1  | 64±1 |
| 4      | $B_y (\pm 1nT)$  | 16    | 9     | -19   | -35   | -35   | -43   | -34   | -22   | -1    | 12   |
|        | $B_x (\pm 1nT)$  | -25   | -55   | -72   | -46   | -41   | 16    | 48    | 73    | 63    | 34   |
|        | $B_z (\pm 1nT)$  | 97    | 83    | 58    | 36    | 32    | 22    | 30    | 55    | 84    | 88   |
|        | $B (\pm 1nT)$    | 101   | 100   | 94    | 68    | 63    | 51    | 66    | 94    | 105   | 95   |
|        | $\theta_B^\circ$ | 81±1  | 85±1  | -78±1 | -59±1 | -56±1 | -32±1 | -59±1 | -76±1 | -89±1 | 83±1 |
|        | $\phi_B^\circ$   | 104±1 | 124±1 | 141±1 | 142±1 | 142±1 | 54±2  | 32±1  | 37±1  | 53±1  | 69±1 |
| 5      | $B_y (\pm 1nT)$  | 19    | 17    | -15   | -30   | -37   | -36   | -33   | -13   | -5    | 17   |
|        | $B_x (\pm 1nT)$  | -21   | -52   | -72   | -49   | -36   | 21    | 44    | 70    | 71    | 49   |
|        | $B_z (\pm 1nT)$  | 86    | 89    | 62    | 42    | 42    | 28    | 43    | 62    | 82    | 85   |
|        | $B (\pm 1nT)$    | 91    | 104   | 96    | 71    | 67    | 50    | 70    | 94    | 109   | 100  |
|        | $\theta_B^\circ$ | 78±1  | 81±1  | -81±1 | -65±1 | -56±1 | -44±1 | -62±1 | -82±1 | 87±1  | 80±1 |

|  |                |       |       |       |       |       |      |      |      |      |      |
|--|----------------|-------|-------|-------|-------|-------|------|------|------|------|------|
|  | $\phi_B^\circ$ | 104±1 | 120±1 | 139±1 | 139±1 | 131±1 | 53±2 | 44±1 | 42±1 | 49±1 | 60±1 |
|--|----------------|-------|-------|-------|-------|-------|------|------|------|------|------|

**Table 10.** Indicative sensor readings with the x-sensor oriented in the grooves’ direction on the body fragments of **vase 3**.

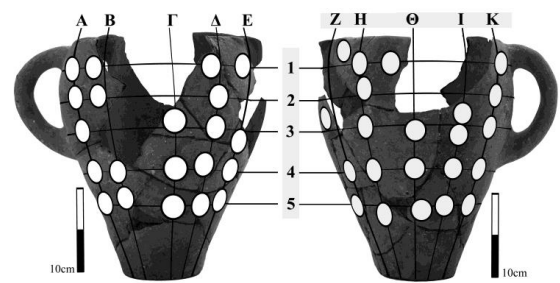

| Vase 4                                                                             |                         |                         |      |                          |      |           |      |      |       |       |
|------------------------------------------------------------------------------------|-------------------------|-------------------------|------|--------------------------|------|-----------|------|------|-------|-------|
|  |                         |                         |      |                          |      |           |      |      |       |       |
|                                                                                    |                         | $\alpha_y^{\perp}$ (cm) |      | $\alpha_{x,z}^{//}$ (cm) |      | $\lambda$ |      |      |       |       |
|                                                                                    |                         | 0.67±0,03               |      | 1.15±0,02                |      | 1.97±0,01 |      |      |       |       |
|                                                                                    |                         | A                       | B    | Г                        | Δ    | E         | Z    | H    | Θ     | I     |
| 1                                                                                  | D (±0.3) cm             |                         |      | 1.7                      | 1.6  |           | 4,2  |      | 5,7   |       |
|                                                                                    | L (±0.1) cm             |                         |      | 0.9                      | 1.2  |           | 1,1  |      | 0,9   |       |
|                                                                                    | B <sub>xz</sub> (±1) nT |                         |      | 37                       | 35   |           | 40   |      | 54    |       |
|                                                                                    | B <sub>y</sub> (±1) nT  |                         |      | 16                       | 15   |           | 17   |      | 5     |       |
|                                                                                    | B (±1) nT               |                         |      | 40                       | 38   |           | 44   |      | 54    |       |
|                                                                                    | θ <sub>θ</sub> °        |                         |      | 66±1                     | 66±2 |           | 67±1 |      | 85±1  |       |
|                                                                                    | 2                       |                         |      | D (±0.3) cm              |      |           | 4.2  |      | 6.7   |       |
| L (±0.1) cm                                                                        |                         | 1.3                     | 1.3  | 1.3                      |      | 1.2       | 1.3  | 1.3  | 1.3   | 1.5   |
| B <sub>xz</sub> (±1) nT                                                            |                         | 47                      | 43   | 43                       |      | 43        | 46   | 43   | 48    | 55    |
| B <sub>y</sub> (±1) nT                                                             |                         | 15                      | 14   | 18                       |      | 18        | 12   | 10   | 9     | 3     |
| B (±1) nT                                                                          |                         | 49                      | 45   | 47                       |      | 47        | 48   | 44   | 49    | 55    |
| θ <sub>θ</sub> °                                                                   |                         | 72±1                    | 72±1 | 67±1                     |      | 67±1      | 75±1 | 77±1 | 79±1  | 87±1  |
| 3                                                                                  |                         | D (±0.3) cm             | 1.9  | 10,6                     |      | 2.0       | 9.1  | 9.9  | 13.9  | 4.4   |
|                                                                                    | L (±0.1) cm             | 1.8                     | 1.7  | 1.8                      | 1.8  | 1.8       | 1.7  | 1.7  | 1.6   | 1.7   |
|                                                                                    | B <sub>xz</sub> (±1) nT | 53                      | 52   | 47                       | 47   | 47        | 50   | 53   | 55    | 49    |
|                                                                                    | B <sub>y</sub> (±1) nT  | 5                       | 12   | 13                       | 12   | 14        | 10   | 7    | 2     | -3    |
|                                                                                    | B (±1) nT               | 53                      | 53   | 49                       | 49   | 49        | 51   | 53   | 55    | 49    |
|                                                                                    | θ <sub>θ</sub> °        | 85±1                    | 77±1 | 74±1                     | 75±1 | 73±1      | 79±1 | 82±1 | 88±1  | -86±1 |
|                                                                                    | 4                       | D (±0.3) cm             |      |                          | 1.7  | 2.8       | 3.0  | 2.3  | 7.5   | 3>8   |
| L (±0.1) cm                                                                        |                         | 2.1                     |      |                          | 2.1  | 2.0       | 2.1  | 2.1  | 2.0   | 2.0   |
| B <sub>xz</sub> (±1) nT                                                            |                         | 50                      |      |                          | 45   | 49        | 53   | 55   | 55    | 53    |
| B <sub>y</sub> (±1) nT                                                             |                         | 9                       |      |                          | 9    | 10        | 5    | 4    | -2    | -5    |
| B (±1) nT                                                                          |                         | 51                      |      |                          | 46   | 50        | 53   | 55   | 55    | 53    |
| θ <sub>θ</sub> °                                                                   |                         | 80±1                    |      |                          | 79±1 | 78±1      | 85±1 | 86±1 | -88±1 | -85±1 |
| 5                                                                                  |                         | D (±0.3) cm             |      |                          |      |           | 4.8  | 2.6  | 6.6   | 5.5   |
|                                                                                    | L (±0.1) cm             | 2.2                     | 2.3  | 2.2                      |      |           | 2.1  | 2.3  | 2.1   | 2.2   |
|                                                                                    | B <sub>xz</sub> (±1) nT | 53                      | 54   | 53                       |      |           | 55   | 54   | 48    | 51    |
|                                                                                    | B <sub>y</sub> (±1) nT  | 6                       | 7    | 6                        |      |           | 3    | -1   | -6    | -9    |
|                                                                                    | B (±1) nT               | 53                      | 54   | 53                       |      |           | 55   | 54   | 48    | 52    |
|                                                                                    |                         |                         |      |                          |      |           |      |      |       |       |

|  |                  |  |  |          |          |          |          |           |           |           |
|--|------------------|--|--|----------|----------|----------|----------|-----------|-----------|-----------|
|  | $\theta_s^\circ$ |  |  | $83\pm1$ | $83\pm1$ | $83\pm1$ | $87\pm1$ | $-89\pm1$ | $-83\pm1$ | $-80\pm1$ |
|--|------------------|--|--|----------|----------|----------|----------|-----------|-----------|-----------|

**Table 11.** Measurements D, L, and sensor readings of  $B_i$  ( $i=xz,y$ ), with the x-sensor aligned along the common direction of  $B_{xz}$ ,  $M_{xz}$ , on the body fragments of **vase 4**.

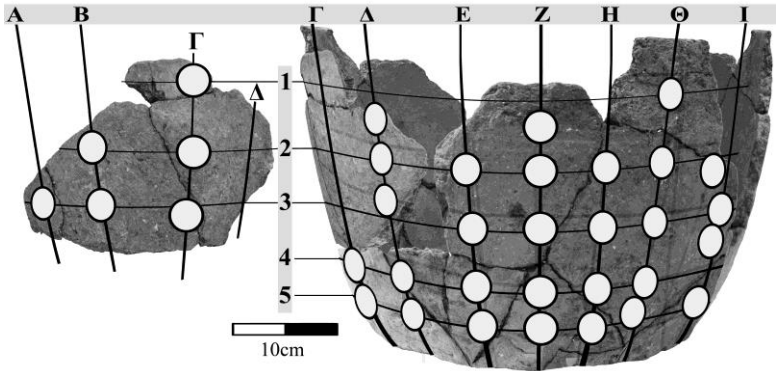



**Table 12.** Indicative sensor readings with the x-sensor oriented in the grooves' direction on the body fragments of **vase 4**.

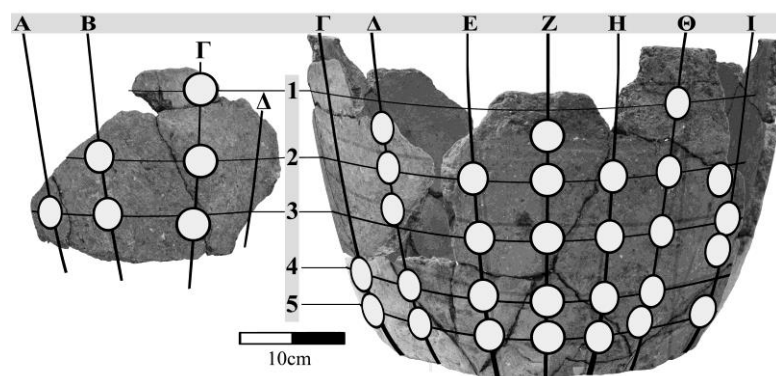

| Vase 4 |                  |      |      |      |      |       |       |       |       |       |
|--------|------------------|------|------|------|------|-------|-------|-------|-------|-------|
|        |                  | A    | B    | Γ    | Δ    | E     | Z     | H     | Θ     | I     |
| 1      | $B_y (\pm 1nT)$  |      |      | 16   | 16   |       | 17    |       | 6     |       |
|        | $B_x (\pm 1nT)$  |      |      | 10   | 3    |       | -23   |       | -39   |       |
|        | $B_z (\pm 1nT)$  |      |      | 33   | 14   |       | 37    |       | 38    |       |
|        | $B (\pm 1nT)$    |      |      | 38   | 38   |       | 47    |       | 55    |       |
|        | $\theta_B^\circ$ |      |      | 65±1 | 65±2 |       | 68±1  |       | 84±1  |       |
|        | $\phi_B^\circ$   |      |      | 73±1 | 85±2 |       | 122±1 |       | 136±1 |       |
| 2      | $B_y (\pm 1nT)$  |      | 14   | 15   | 17   | 18    | 12    | 10    | 8     | 2     |
|        | $B_x (\pm 1nT)$  |      | 27   | 13   | 2    | -11   | -16   | -27   | -30   | -35   |
|        | $B_z (\pm 1nT)$  |      | 45   | 41   | 38   | 40    | 34    | 33    | 33    | 33    |
|        | $B (\pm 1nT)$    |      | 54   | 46   | 42   | 45    | 40    | 44    | 45    | 48    |
|        | $\theta_B^\circ$ |      | 75±1 | 71±1 | 66±2 | 66±1  | 72±2  | 77±1  | 80±1  | 88±1  |
|        | $\phi_B^\circ$   |      | 59±1 | 72±1 | 87±2 | 105±1 | 115±2 | 129±1 | 132±1 | 137±1 |
| 3      | $B_y (\pm 1nT)$  | 6    | 11   | 13   | 12   | 14    | 10    | 7     | 1     | -2    |
|        | $B_x (\pm 1nT)$  | 33   | 21   | 4    | 6    | -8    | -24   | -32   | -40   | -35   |
|        | $B_z (\pm 1nT)$  | 37   | 38   | 40   | 41   | 43    | 43    | 43    | 39    | 32    |
|        | $B (\pm 1nT)$    | 50   | 45   | 42   | 43   | 46    | 50    | 54    | 56    | 47    |
|        | $\theta_B^\circ$ | 83±1 | 76±1 | 72±1 | 74±1 | 72±1  | 78±1  | 82±1  | 89±1  | -88±1 |
|        | $\phi_B^\circ$   | 48±1 | 61±1 | 84±1 | 82±1 | 101±1 | 119±1 | 127±1 | 136±1 | 138±1 |
| 4      | $B_y (\pm 1nT)$  |      |      | 9    | 9    | 11    | 6     | 4     | -1    | -6    |
|        | $B_x (\pm 1nT)$  |      |      | 12   | 1    | -9    | -26   | -27   | -35   | -38   |
|        | $B_z (\pm 1nT)$  |      |      | 49   | 44   | 51    | 41    | 40    | 34    | 32    |
|        | $B (\pm 1nT)$    |      |      | 51   | 45   | 53    | 49    | 48    | 49    | 50    |
|        | $\theta_B^\circ$ |      |      | 80±1 | 78±1 | 78±1  | 83±1  | 85±1  | -89±1 | -83±1 |
|        | $\phi_B^\circ$   |      |      | 76±1 | 89±1 | 100±1 | 122±1 | 124±1 | 136±1 | 140±1 |
| 5      | $B_y (\pm 1nT)$  |      |      | 6    | 7    | 7     | 3     | -1    | -5    | -9    |
|        | $B_x (\pm 1nT)$  |      |      | 8    | 3    | -11   | -19   | -32   | -39   | -41   |
|        | $B_z (\pm 1nT)$  |      |      | 51   | 51   | 48    | 44    | 43    | 35    | 33    |
|        | $B (\pm 1nT)$    |      |      | 52   | 52   | 50    | 48    | 54    | 53    | 53    |
|        | $\theta_B^\circ$ |      |      | 83±1 | 82±1 | 82±1  | 86±1  | -89±1 | -84±1 | -80±1 |
|        |                  |      |      | 81±1 | 87±1 | 103±1 | 113±1 | 127±1 | 138±1 | 141±1 |



| Vase 5                                                                              |                         |       |       |       |       |       |       |       |       |
|-------------------------------------------------------------------------------------|-------------------------|-------|-------|-------|-------|-------|-------|-------|-------|
|  |                         |       |       |       |       |       |       |       |       |
|                                                                                     |                         | A     | B     | Γ     | Δ     | E     | Z     | H     | Θ     |
| 1                                                                                   | D (±0.3) cm             | 10.4  | 2.2   | 4.7   | 1.8   | 10.4  | 7.6   | 3.3   | 1.2   |
|                                                                                     | L (±0.1) cm             | 2.9   | 2.8   | 2.7   | 2.7   | 2.6   | 2.6   | 2.5   | 2.6   |
|                                                                                     | B <sub>xz</sub> (±1) nT | 45    | 53    | 58    | 62    | 66    | 66    | 71    | 67    |
|                                                                                     | B <sub>y</sub> (±1) nT  | -24   | -22   | -19   | -17   | -14   | -9    | -7    | -6    |
|                                                                                     | B (±1) nT               | 51    | 57    | 61    | 64    | 67    | 67    | 71    | 67    |
|                                                                                     | Θ <sub>8</sub> °        | -62±1 | -68±1 | -72±1 | -75±1 | -78±1 | -82±1 | -84±1 | -85±1 |
| 2                                                                                   | D (±0.3) cm             | 3.0   | 6.0   | 7.1   | 8.6   | 6.9   | 3.8   | 1.8   | 4.7   |
|                                                                                     | L (±0.1) cm             | 2.4   | 2.4   | 2.3   | 2.3   | 2.3   | 2.2   | 2.2   | 2.2   |
|                                                                                     | B <sub>xz</sub> (±1) nT | 55    | 57    | 61    | 64    | 64    | 70    | 70    | 72    |
|                                                                                     | B <sub>y</sub> (±1) nT  | -21   | -20   | -18   | -15   | -12   | -6    | -7    | -1    |
|                                                                                     | B (±1) nT               | 59    | 60    | 64    | 66    | 65    | 70    | 70    | 72    |
|                                                                                     | Θ <sub>8</sub> °        | -69±1 | -71±1 | -74±1 | -77±1 | -80±1 | -85±1 | -84±1 | -89±1 |
| 3                                                                                   | D (±0.3) cm             | 15.4  | 25.0  | 26.4  | 32.1  | 23.1  | 6.7   | 4.8   |       |
|                                                                                     | L (±0.1) cm             | 2.2   | 2.2   | 2.1   | 2.0   | 2.0   | 2.0   | 1.9   |       |
|                                                                                     | B <sub>xz</sub> (±1) nT | 53    | 60    | 64    | 66    | 66    | 68    | 68    |       |
|                                                                                     | B <sub>y</sub> (±1) nT  | -21   | -19   | -15   | -14   | -10   | -11   | -3    |       |
|                                                                                     | B (±1) nT               | 57    | 63    | 66    | 67    | 67    | 69    | 68    |       |
|                                                                                     | Θ <sub>8</sub> °        | -69±1 | -73±1 | -77±1 | -78±1 | -82±1 | -81±1 | -88±1 |       |
| 4                                                                                   | D (±0.3) cm             | 7.4   | 12.9  | 4.3   | 20.7  | 20.8  | 13.1  | 6.4   |       |
|                                                                                     | L (±0.1) cm             | 2.0   | 2.0   | 1.9   | 1.9   | 1.8   | 1.8   | 1.7   |       |
|                                                                                     | B <sub>xz</sub> (±1) nT | 41    | 49    | 57    | 61    | 61    | 65    | 66    |       |
|                                                                                     | B <sub>y</sub> (±1) nT  | -26   | -24   | -20   | -17   | -17   | -14   | -11   |       |
|                                                                                     | B (±1) nT               | 48    | 54    | 60    | 63    | 63    | 66    | 67    |       |
|                                                                                     | Θ <sub>8</sub> °        | -58±1 | -64±1 | -71±1 | -75±1 | -75±1 | -78±1 | -81±1 |       |
| 5                                                                                   | D (±0.3) cm             |       | 28.4  | 6.0   | 20.0  | 14.2  | 9.2   | 3.6   |       |
|                                                                                     | L (±0.1) cm             |       | 1.7   | 1.6   | 1.5   | 1.5   | 1.5   | 1.4   |       |
|                                                                                     | B <sub>xz</sub> (±1) nT |       | 38    | 50    | 51    | 57    | 62    | 64    |       |
|                                                                                     | B <sub>y</sub> (±1) nT  |       | -27   | -23   | -22   | -19   | -16   | -14   |       |

|  |                       |  |        |       |       |       |       |       |  |
|--|-----------------------|--|--------|-------|-------|-------|-------|-------|--|
|  | $B(\pm 1) \text{ nT}$ |  | 46     | 55    | 55    | 60    | 64    | 65    |  |
|  | $\theta_8^\circ$      |  | -55±11 | -66±1 | -67±1 | -72±1 | -76±1 | -78±1 |  |

**Table 13a.** Measurements D, L, and sensor readings of  $B_i$  ( $i=xz,y$ ), with the x-sensor aligned along the common direction of  $B_{xz}$ ,  $M_{xz}$ , on the body fragments of **vase 5**.

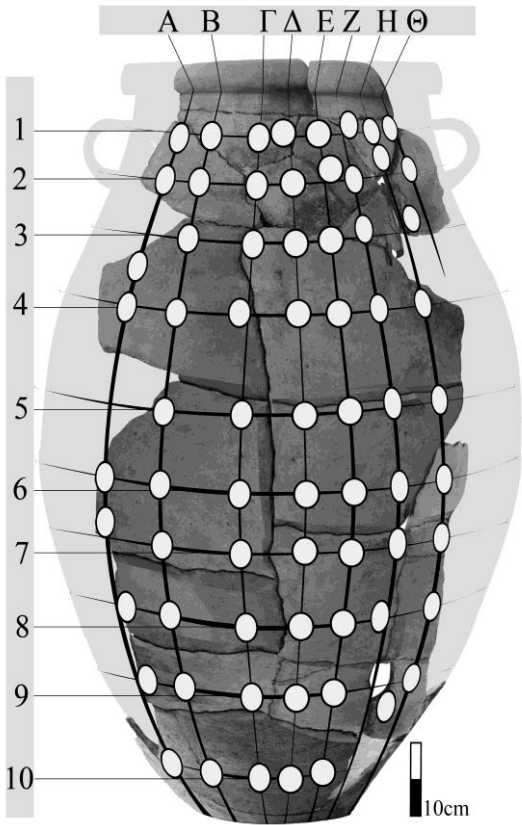

| Vase 5 |                                | A           | B           | $\Gamma$    | $\Delta$    | E           | Z           | H           | $\Theta$ |
|--------|--------------------------------|-------------|-------------|-------------|-------------|-------------|-------------|-------------|----------|
| 6      | D ( $\pm 0.3$ ) cm             | 12.9        | 17.1        | 6.1         | 15.5        | 9.0         | 3.0         | 3.3         |          |
|        | L ( $\pm 0.1$ ) cm             | 1.4         | 1.4         | 1.4         | 1.4         | 1.4         | 1.3         | 1.3         |          |
|        | B <sub>xz</sub> ( $\pm 1$ ) nT | 21          | 22          | 34          | 41          | 51          | 56          | 59          |          |
|        | B <sub>y</sub> ( $\pm 1$ ) nT  | -29         | -29         | -26         | -25         | -21         | -21         | -17         |          |
|        | B ( $\pm 1$ ) nT               | 35          | 36          | 43          | 48          | 55          | 60          | 61          |          |
|        | $\theta_B^\circ$               | -36 $\pm 2$ | -38 $\pm 2$ | -53 $\pm 1$ | -59 $\pm 1$ | -68 $\pm 1$ | -70 $\pm 1$ | -74 $\pm 1$ |          |
|        |                                |             |             |             |             |             |             |             |          |
| 7      | D ( $\pm 0.3$ ) cm             | 4.5         | 6.3         | 5.3         | 14.9        | 8.0         | 1.8         | 1.4         |          |
|        | L ( $\pm 0.1$ ) cm             | 2.5         | 1.5         | 1.4         | 1.4         | 1.5         | 1.5         | 1.5         |          |
|        | B <sub>xz</sub> ( $\pm 1$ ) nT | 16          | 25          | 27          | 37          | 53          | 53          | 51          |          |
|        | B <sub>y</sub> ( $\pm 1$ ) nT  | -30         | -28         | -27         | -26         | -22         | -19         | -18         |          |
|        | B ( $\pm 1$ ) nT               | 34          | 37          | 38          | 45          | 57          | 56          | 54          |          |
|        | $\theta_B^\circ$               | -28 $\pm 2$ | -42 $\pm 2$ | -45 $\pm 2$ | -55 $\pm 1$ | -68 $\pm 1$ | -71 $\pm 1$ | -71 $\pm 1$ |          |
|        |                                |             |             |             |             |             |             |             |          |
| 8      | D ( $\pm 0.3$ ) cm             | 9.1         | 10.0        | 5.7         | 13.8        | 7.6         | 2.0         | 1.7         |          |
|        | L ( $\pm 0.1$ ) cm             | 1.6         | 1.7         | 1.6         | 1.6         | 1.6         | 1.7         | 1.7         |          |
|        | B <sub>xz</sub> ( $\pm 1$ ) nT | 8           | 19          | 28          | 40          | 47          | 52          | 54          |          |
|        | B <sub>y</sub> ( $\pm 1$ ) nT  | -32         | -31         | -29         | -25         | -24         | -22         | -21         |          |
|        | B ( $\pm 1$ ) nT               | 33          | 36          | 40          | 47          | 53          | 56          | 58          |          |
|        | $\theta_B^\circ$               | -14 $\pm 2$ | -32 $\pm 2$ | -44 $\pm 1$ | -58 $\pm 1$ | -63 $\pm 1$ | -67 $\pm 1$ | -69 $\pm 1$ |          |
|        |                                |             |             |             |             |             |             |             |          |
| 9      | D ( $\pm 0.3$ ) cm             | 5.3         | 13.5        | 3.7         | 11.1        | 5.6         | 5.5         | 2.4         |          |
|        | L ( $\pm 0.1$ ) cm             | 1.7         | 1.7         | 1.7         | 1.8         | 1.8         | 1.9         | 1.9         |          |
|        | B <sub>xz</sub> ( $\pm 1$ ) nT | 11          | 24          | 34          | 38          | 44          | 49          | 56          |          |
|        | B <sub>y</sub> ( $\pm 1$ ) nT  | -31         | -29         | -27         | -27         | -26         | -23         | -20         |          |
|        | B ( $\pm 1$ ) nT               | 33          | 37          | 43          | 46          | 51          | 54          | 59          |          |
|        | $\theta_B^\circ$               | -19 $\pm 2$ | -40 $\pm 2$ | -52 $\pm 1$ | -55 $\pm 1$ | -60 $\pm 1$ | -65 $\pm 1$ | -71 $\pm 1$ |          |
|        |                                |             |             |             |             |             |             |             |          |
|        |                                | 7.8         | 21.7        | 15.2        | 9.9         | 4.2         |             |             |          |
|        |                                | 2.1         | 2.1         | 2.2         | 2.3         | 2.3         |             |             |          |

**Table 13b.** Measurements D, L, and sensor readings of  $B_i$  ( $i=xz,y$ ), with the x-sensor aligned along the common direction of  $B_{xz}$ ,  $M_{xz}$ , on the body fragments of **vase 5**.

|                           |  |       |       |       |       |       |  |  |  |
|---------------------------|--|-------|-------|-------|-------|-------|--|--|--|
| <div>1</div> <div>0</div> |  | 17    | 22    | 31    | 37    | 43    |  |  |  |
|                           |  | -32   | -31   | -30   | -28   | -27   |  |  |  |
|                           |  | 36    | 38    | 43    | 46    | 51    |  |  |  |
|                           |  | -28±2 | -36±2 | -46±1 | -53±1 | -58±1 |  |  |  |

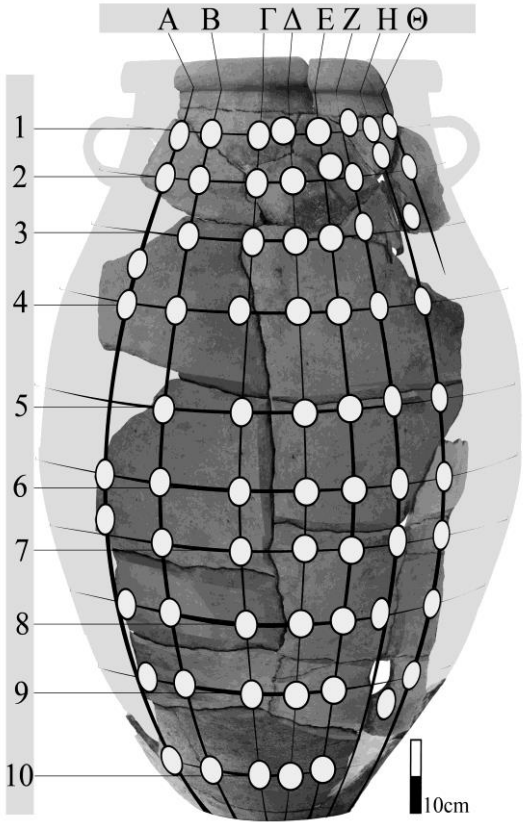

| Vase 5                                                                             |                       |       |       |       |       |       |       |       |       |
|------------------------------------------------------------------------------------|-----------------------|-------|-------|-------|-------|-------|-------|-------|-------|
|  |                       |       |       |       |       |       |       |       |       |
|                                                                                    |                       | A     | B     | Γ     | Δ     | E     | Z     | H     | Θ     |
| 1                                                                                  | B <sub>y</sub> (±1nT) | -23   | -23   | -19   | -17   | -14   | -9    | -7    | -6    |
|                                                                                    | B <sub>x</sub> (±1nT) | -11   | -24   | -32   | -40   | -49   | -53   | -58   | -59   |
|                                                                                    | B <sub>z</sub> (±1nT) | 48    | 45    | 47    | 45    | 41    | 42    | 38    | 38    |
|                                                                                    | B(±1nT)               | 54    | 56    | 60    | 62    | 65    | 68    | 70    | 70    |
|                                                                                    | Θ <sub>B</sub> °      | 115±1 | -66±1 | -72±1 | -74±1 | -78±1 | -83±1 | -84±1 | -85±1 |
|                                                                                    | Φ <sub>B</sub> °      | 103±1 | 118±1 | 124±1 | 132±1 | 140±1 | 142±1 | 147±1 | 147±1 |
| 2                                                                                  | B <sub>y</sub> (±1nT) | -20   | -21   | -18   | -15   | -12   | -6    | -7    | -1    |
|                                                                                    | B <sub>x</sub> (±1nT) | -12   | -20   | -35   | -40   | -46   | -53   | -53   | -57   |
|                                                                                    | B <sub>z</sub> (±1nT) | 56    | 53    | 47    | 50    | 47    | 43    | 43    | 39    |
|                                                                                    | B(±1nT)               | 61    | 60    | 61    | 66    | 67    | 70    | 69    | 69    |
|                                                                                    | Θ <sub>B</sub> °      | -71±1 | -70±1 | -73±1 | -77±1 | -80±1 | -85±1 | -84±1 | -89±1 |
|                                                                                    | Φ <sub>B</sub> °      | 102±1 | 111±1 | 127±1 | 129±1 | 134±1 | 141±1 | 141±1 | 146±1 |
| 3                                                                                  | B <sub>y</sub> (±1nT) | -22   | -19   | -15   | -14   | -10   | -11   | -3    |       |
|                                                                                    | B <sub>x</sub> (±1nT) | -17   | -24   | -31   | -45   | -47   | -48   | -55   |       |
|                                                                                    | B <sub>z</sub> (±1nT) | 47    | 52    | 55    | 46    | 49    | 46    | 42    |       |
|                                                                                    | B(±1nT)               | 54    | 60    | 65    | 66    | 69    | 67    | 69    |       |
|                                                                                    | Θ <sub>B</sub> °      | -67±1 | -72±1 | -77±1 | -78±1 | -82±1 | -81±1 | -88±1 |       |
|                                                                                    | Φ <sub>B</sub> °      | 110±1 | 115±1 | 119±1 | 134±1 | 134±1 | 136±1 | 143±1 |       |
| 4                                                                                  | B <sub>y</sub> (±1nT) | -26   | -23   | -20   | -17   | -16   | -13   | -11   |       |
|                                                                                    | B <sub>x</sub> (±1nT) | -13   | -23   | -32   | -43   | -46   | -54   | -57   |       |
|                                                                                    | B <sub>z</sub> (±1nT) | 40    | 44    | 45    | 44    | 40    | 40    | 42    |       |
|                                                                                    | B(±1nT)               | 49    | 55    | 59    | 64    | 63    | 68    | 72    |       |
|                                                                                    | Θ <sub>B</sub> °      | -59±2 | -65±1 | -70±1 | -75±1 | -76±1 | -79±1 | -81±1 |       |
|                                                                                    | Φ <sub>B</sub> °      | 108±1 | 118±1 | 125±1 | 134±1 | 139±1 | 143±1 | 144±1 |       |
| 5                                                                                  | B <sub>y</sub> (±1nT) |       | -27   | -23   | -22   | -18   | -15   | -14   |       |
|                                                                                    | B <sub>x</sub> (±1nT) |       | -21   | -36   | -37   | -48   | -50   | -55   |       |
|                                                                                    | B <sub>z</sub> (±1nT) |       | 33    | 36    | 34    | 34    | 35    | 33    |       |
|                                                                                    | B(±1nT)               |       | 47    | 56    | 55    | 61    | 63    | 66    |       |

|  |                  |  |       |       |       |       |       |       |  |
|--|------------------|--|-------|-------|-------|-------|-------|-------|--|
|  | $\theta_B^\circ$ |  | -56±2 | -66±1 | -67±1 | -73±1 | -76±1 | -78±1 |  |
|  | $\phi_B^\circ$   |  | 122±1 | 135±1 | 137±1 | 145±1 | 145±1 | 149±1 |  |

**Table 14a.** Indicative sensor readings with the x-sensor oriented in the grooves’ direction on the body fragments of **vase 5**.

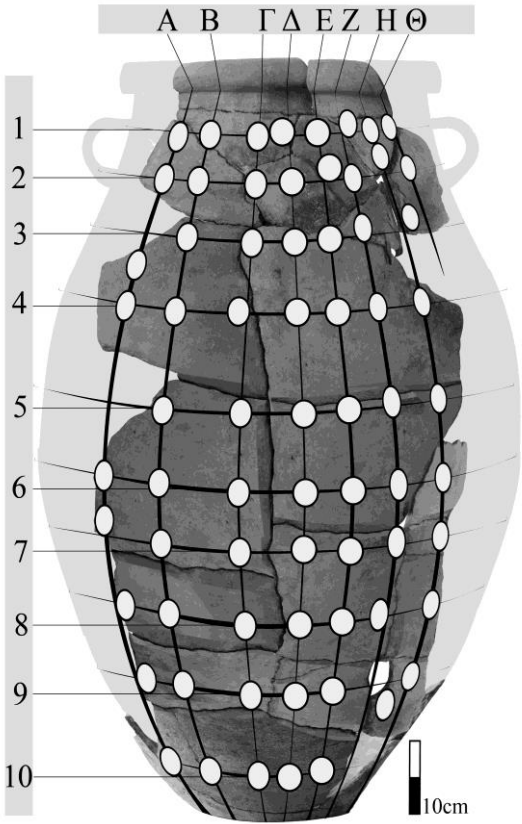

| Vase 5 |                        |       |       |       |       |       |       |       |   |
|--------|------------------------|-------|-------|-------|-------|-------|-------|-------|---|
|        |                        |       |       |       |       |       |       |       |   |
|        |                        | A     | B     | Г     | Δ     | E     | Z     | H     | Θ |
| 6      | $B_y (\pm 1\text{nT})$ | -28   | -28   | -26   | -24   | -20   | -20   | -17   |   |
|        | $B_x (\pm 1\text{nT})$ | -10   | -16   | -25   | -40   | -45   | -48   | -53   |   |
|        | $B_z (\pm 1\text{nT})$ | 16    | 14    | 24    | 19    | 25    | 27    | 25    |   |
|        | $B (\pm 1\text{nT})$   | 33    | 35    | 43    | 50    | 55    | 58    | 61    |   |
|        | $\theta_B^\circ$       | -34±4 | -38±3 | -54±2 | -62±1 | -69±1 | -70±1 | -74±1 |   |
|        | $\phi_B^\circ$         | 122±3 | 139±3 | 136±2 | 155±1 | 151±1 | 151±1 | 155±1 |   |
| 7      | $B_y (\pm 1\text{nT})$ | -30   | -29   | -27   | -26   | -22   | -19   | -19   |   |
|        | $B_x (\pm 1\text{nT})$ | -9    | -20   | -24   | -35   | -47   | -48   | -47   |   |
|        | $B_z (\pm 1\text{nT})$ | 11    | 13    | 12    | 16    | 22    | 20    | 22    |   |
|        | $B (\pm 1\text{nT})$   | 33    | 37    | 38    | 46    | 56    | 55    | 55    |   |
|        | $\theta_B^\circ$       | -26±5 | -40±3 | -45±3 | -56±2 | -67±1 | -70±1 | -70±1 |   |
|        | $\phi_B^\circ$         | 129±4 | 147±2 | 153±2 | 155±1 | 155±1 | 157±1 | 155±1 |   |
| 8      | $B_y (\pm 1\text{nT})$ | -31   | -31   | -29   | -25   | -23   | -21   | -20   |   |
|        | $B_x (\pm 1\text{nT})$ | -8    | -21   | -30   | -39   | -45   | -51   | -53   |   |
|        | $B_z (\pm 1\text{nT})$ | 5     | 4     | 4     | 13    | 12    | 14    | 18    |   |
|        | $B (\pm 1\text{nT})$   | 32    | 37    | 42    | 48    | 52    | 57    | 59    |   |
|        | $\theta_B^\circ$       | -17±8 | -35±3 | -47±2 | -59±2 | -64±1 | -69±1 | -71±1 |   |
|        | $\phi_B^\circ$         | 148±6 | 169±3 | 172±2 | 162±1 | 165±1 | 165±1 | 161±1 |   |
| 9      | $B_y (\pm 1\text{nT})$ | -32   | -29   | -27   | -27   | -25   | -23   | -21   |   |
|        | $B_x (\pm 1\text{nT})$ | -11   | -23   | -33   | -38   | -44   | -52   | -56   |   |
|        | $B_z (\pm 1\text{nT})$ | -10   | -5    | -4    | 0     | 2     | 5     | 9     |   |
|        | $B (\pm 1\text{nT})$   | 35    | 37    | 43    | 46    | 50    | 57    | 60    |   |
|        | $\theta_B^\circ$       | -25±5 | -39±3 | -51±2 | -55±2 | -61±1 | -67±1 | -70±1 |   |
|        | $\phi_B^\circ$         | 222±4 | 192±2 | 187±2 | 180±2 | 177±1 | 175±1 | 171±1 |   |
|        | $B_y (\pm 1\text{nT})$ | -32   | -31   | -30   | -28   | -26   |       |       |   |
|        | $B_x (\pm 1\text{nT})$ | -7    | -21   | -34   | -38   | -45   |       |       |   |
|        | $B_z (\pm 1\text{nT})$ | -14   | -12   | -8    | -11   | -6    |       |       |   |

**Table 14b.** Indicative sensor readings with the x-sensor oriented in the grooves' direction on the body fragments of **vase 5**.

|    |                  |       |       |       |       |       |  |  |  |
|----|------------------|-------|-------|-------|-------|-------|--|--|--|
| 10 | B(±1nT)          | 35    | 39    | 46    | 48    | 52    |  |  |  |
|    | $\theta_B^\circ$ | -26±5 | -38±3 | -50±2 | -55±2 | -61±1 |  |  |  |
|    | $\phi_B^\circ$   | 243±4 | 210±2 | 193±2 | 196±1 | 188±1 |  |  |  |

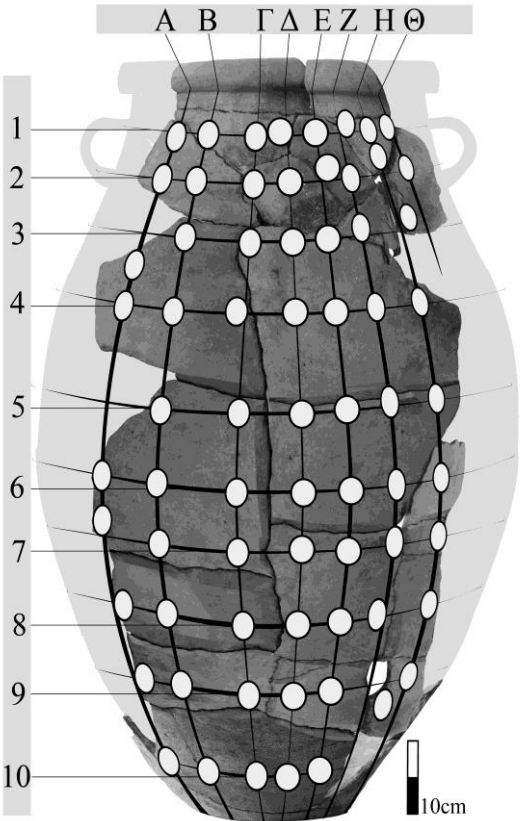

Supplement: s2 [file s2]
